# Supplementary material for: The Economic Accessibility of CO<sub>2</sub> Sequestration Through Bioenergy with Carbon Capture and Sequestration (BECCS) in the US
Source: Preprints.org preprint supplement (doi:10.20944/preprints202008.0484.v1), 2020-08-21
Supplement: Supplementary file 1 [file supplementary]

# Supplementary Materials

To quantify gross and net sequestration potential and associated costs of BECCS, supply chain logistics and power generation were modeled. County-level potential biomass resources at specified years and prices were drawn from [1], and potential saline basins where BECCS is possible are delineated from geologic assessments [2] following Baik, *et al.* [3]. Sites suitable for power generation and BECCS within saline basins were modeled with Oak Ridge Siting Analysis for power Generation Expansion (OR-SAGE). Costs and emissions of biomass logistics and power generation were modeled with (BILT) and (IECM) respectively. Modeling assumptions regarding biomass resources, sequestration basins, BECCS locations, CO<sub>2</sub> supply chain emissions, injection wells and CO<sub>2</sub> storage, and power generation assumptions are described below. Detailed outputs are available at doi: 10.11578/1647453

## 1. CO<sub>2</sub> budget assumptions for the feedstock supply chain

Assumptions of CO<sub>2</sub> emissions from biomass production, harvest, pre-processing, transportation, estimated potential changes in soil organic carbon, and power generation are derived from various sources [4-7] and are shown in Table S1. Power for densification to make pellets is assumed to come from BECCs and is not burdened with CO<sub>2</sub> emissions.

**Table S1.** Summary of CO<sub>2</sub> emissions by feedstock and logistics step used in this analysis (energy cane and eucalyptus, comprising about 1% of supplies, assume emissions same as for switchgrass and poplar, respectively).

| Feedstock                                | CO <sub>2</sub>                                                                            |                                                                                          |                                                                          |                                                                           |               |
|------------------------------------------|--------------------------------------------------------------------------------------------|------------------------------------------------------------------------------------------|--------------------------------------------------------------------------|---------------------------------------------------------------------------|---------------|
|                                          | CO <sub>2</sub> captured<br>(kg CO <sub>2</sub> / dry<br>tonne of<br>biomass) <sup>1</sup> | CO <sub>2</sub> emitted                                                                  |                                                                          |                                                                           | Form          |
|                                          |                                                                                            | Production and<br>harvest (kg CO <sub>2</sub> /<br>dry tonne of<br>biomass) <sup>2</sup> | Power Gen (kg<br>CO <sub>2</sub> / dry tonne<br>of biomass) <sup>3</sup> | Transportation<br>(kgs of CO <sub>2</sub> /<br>dry tonne-km) <sup>4</sup> |               |
| Barley straw                             | 1,205                                                                                      | 73.0                                                                                     | 133.90                                                                   | 0.1587<br>0.1785                                                          | Pellet<br>Raw |
| Biomass sorghum                          | 1,205                                                                                      | 107.7                                                                                    | 133.90                                                                   | 0.1587<br>0.1785                                                          | Pellet<br>Raw |
| Corn stover                              | 1,205                                                                                      | 54.3                                                                                     | 133.90                                                                   | 0.1587<br>0.1785                                                          | Pellet<br>Raw |
| Hardwood,<br>lowland logging<br>residues | 966                                                                                        | 5.2                                                                                      | 107.40                                                                   | 0.1586<br>0.2380                                                          | Pellet<br>Raw |
| Hardwood,<br>lowland whole<br>trees      | 966                                                                                        | 14.4                                                                                     | 107.40                                                                   | 0.1586<br>0.2380                                                          | Pellet<br>Raw |
| Hardwood,<br>upland logging<br>residues  | 966                                                                                        | 5.3                                                                                      | 107.40                                                                   | 0.1586<br>0.2380                                                          | Pellet<br>Raw |
| Hardwood,<br>upland whole<br>trees       | 966                                                                                        | 14.7                                                                                     | 107.40                                                                   | 0.1586<br>0.2380                                                          | Pellet<br>Raw |
| Miscanthus                               | 1,326                                                                                      | 84.9                                                                                     | 147.40                                                                   | 0.1569<br>0.1680                                                          | Pellet<br>Raw |
| Mixedwood<br>logging residues            | 966                                                                                        | 5.2                                                                                      | 107.40                                                                   | 0.1586<br>0.2380                                                          | Pellet<br>Raw |
| Mixedwood whole<br>trees                 | 966                                                                                        | 15.2                                                                                     | 107.40                                                                   | 0.1586<br>0.2380                                                          | Pellet<br>Raw |
| Oats straw                               | 1,205                                                                                      | 42.9                                                                                     | 133.90                                                                   | 0.1587<br>0.1785                                                          | pellet<br>raw |

**Table S1.** Summary of CO<sub>2</sub> emissions by feedstock and logistics step used in this analysis (continued).

| Feedstock                             | CO <sub>2</sub>                                                                            |                                                                                          |                                                                          |                                                                           |               |
|---------------------------------------|--------------------------------------------------------------------------------------------|------------------------------------------------------------------------------------------|--------------------------------------------------------------------------|---------------------------------------------------------------------------|---------------|
|                                       | CO <sub>2</sub> captured<br>(kg CO <sub>2</sub> / dry<br>tonne of<br>biomass) <sup>1</sup> | CO <sub>2</sub> emitted                                                                  |                                                                          |                                                                           |               |
|                                       |                                                                                            | Production and<br>harvest (kg CO <sub>2</sub> /<br>dry tonne of<br>biomass) <sup>2</sup> | Power Gen (kg<br>CO <sub>2</sub> / dry tonne<br>of biomass) <sup>3</sup> | Transportation<br>(kgs of CO <sub>2</sub> /<br>dry tonne-km) <sup>4</sup> | Form          |
| Pine                                  | 1,715                                                                                      | 123.5                                                                                    | 191.00                                                                   | 0.1586<br>0.2380                                                          | pellet<br>raw |
| Poplar                                | 966                                                                                        | 64.1                                                                                     | 107.40                                                                   | 0.1586<br>0.2380                                                          | pellet<br>raw |
| Softwood, natural<br>logging residues | 966                                                                                        | 5.2                                                                                      | 107.40                                                                   | 0.1586<br>0.2380                                                          | pellet<br>raw |
| Softwood, natural<br>whole trees      | 966                                                                                        | 14.7                                                                                     | 107.40                                                                   | 0.1586<br>0.2380                                                          | pellet<br>raw |
| Softwood, planted<br>logging residues | 966                                                                                        | 5.4                                                                                      | 107.40                                                                   | 0.1586<br>0.2380                                                          | pellet<br>raw |
| Softwood, planted<br>whole trees      | 966                                                                                        | 16.6                                                                                     | 107.40                                                                   | 0.1586<br>0.2380                                                          | pellet<br>raw |
| Sorghum stubble                       | 1,205                                                                                      | 60.5                                                                                     | 133.90                                                                   | 0.1587<br>0.1785                                                          | pellet<br>raw |
| Switchgrass                           | 1,326                                                                                      | 61.3                                                                                     | 147.40                                                                   | 0.1569<br>0.1680                                                          | pellet<br>raw |
| Wheat straw                           | 1,205                                                                                      | 47.8                                                                                     | 133.90                                                                   | 0.1587<br>0.1785                                                          | pellet<br>raw |
| Willow                                | 966                                                                                        | 129.5                                                                                    | 107.40                                                                   | 0.1586<br>0.2380                                                          | pellet<br>raw |

<sup>1,3</sup>Output from IECM [4].<sup>2</sup> From Canter, Qin, Cai, Dunn, Wang and Scott [5], data for Figure 4.13 (b) downloaded from <https://bioenergykdf.net/billionton2016vol2>.<sup>4</sup>Derived from [6] and [7]

## 2. Biomass resources

**Table S2.** Biomass resources (tonnes) by resource category, near-term (2020) scenario at specified prices (\$ per tonne at farmgate or forest roadside). Base-case scenario for agricultural resources, and medium housing, low-energy demand for forestland resources. County-level data from USDOE [1] downloaded from <https://bioenergykdf.net/bt16-2-download-tool/county>.

| Resource category | Resource        | \$44       | \$66       | \$88        | \$110       |
|-------------------|-----------------|------------|------------|-------------|-------------|
| Crop residues     | Barley straw    | 100,126    | 371,552    | 411,612     | 422,247     |
|                   | Corn stover     | 24,169,531 | 90,583,596 | 100,795,046 | 103,177,816 |
|                   | Oats straw      | 3,700      | 4,831      | 4,913       | 4,959       |
|                   | Sorghum stubble | 270,588    | 638,072    | 644,634     | 633,657     |
|                   | Wheat straw     | 6,265,866  | 13,206,634 | 14,402,050  | 14,110,967  |

**Table S2.** Biomass resources (tonnes) by resource category, near-term (2020) scenario. Base-case scenario for agricultural resources, and medium housing, low-energy demand for forestland resources. County-level data from USDOE [1] downloaded from <https://bioenergykdf.net/bt16-2-download-tool/county> (continued).

| Resource category | Resource                           | \$44       | \$66        | \$88        | \$110       |
|-------------------|------------------------------------|------------|-------------|-------------|-------------|
| Logging residues  | Hardwood, lowland logging residues | 3,345,816  | 3,345,816   | 3,345,816   | 3,345,816   |
|                   | Hardwood, upland logging residues  | 3,408,801  | 3,408,801   | 3,408,801   | 3,408,801   |
|                   | Mixedwood logging residues         | 3,646,180  | 3,646,180   | 3,646,180   | 3,646,180   |
|                   | Softwood, natural logging residues | 5,231,772  | 5,231,772   | 5,231,772   | 5,231,772   |
|                   | Softwood, planted logging residues | 1,543,822  | 1,543,822   | 1,543,822   | 1,543,822   |
|                   |                                    |            |             |             |             |
| Whole trees       | Hardwood, lowland whole trees      | 115,691    | 9,916,418   | 16,853,238  | 16,853,238  |
|                   | Hardwood, upland whole trees       | 15,122     | 23,262,146  | 32,152,170  | 32,152,170  |
|                   | Mixedwood whole trees              | 288,452    | 2,558,992   | 3,040,484   | 3,040,484   |
|                   | Softwood, natural whole trees      | 427,998    | 16,076,980  | 19,456,943  | 19,456,943  |
|                   | Softwood, planted whole trees      | 254,435    | 16,371,436  | 16,554,214  | 16,554,214  |
|                   |                                    |            |             |             |             |
| Grand Total       |                                    | 49,087,902 | 213,957,315 | 279,583,114 | 301,511,860 |

**Table S3.** Biomass resources (million tonnes) by resource category, long-term (2040) scenario. Reported by price (\$ per tonne) at farmgate or forest roadside, i.e., after harvest but before delivery. Base-case scenario for agricultural resources, and medium housing, low-energy demand for forestland resources, from USDOE [1] downloaded from <https://bioenergykdf.net/bt16-2-download-tool/county>. County-level data from USDOE [1] downloaded from <https://bioenergykdf.net/bt16-2-download-tool/county>.

| Resource category       | Resource        | \$44       | \$66        | \$88        | \$110       |
|-------------------------|-----------------|------------|-------------|-------------|-------------|
| Crop residues           | Barley straw    | 382,389    | 516,298     | 567,344     | 588,206     |
|                         | Corn stover     | 40,317,600 | 139,628,155 | 150,873,234 | 150,219,306 |
|                         | Oats straw      | 6,016      | 7,394       | 6,902       | 6,849       |
|                         | Wheat straw     | 11,146,108 | 18,928,318  | 17,915,401  | 17,958,335  |
|                         | Sorghum stubble | 771,932    | 955,544     | 1,045,769   | 980,226     |
| Herbaceous energy crops | Energy cane     | -          | 303,224     | 1,517,418   | 4,032,408   |
|                         | Miscanthus      | 5,902,093  | 145,108,830 | 265,896,008 | 298,022,193 |
|                         | Biomass sorghum | 810,715    | 17,539,242  | 52,848,030  | 86,650,139  |
|                         | Switchgrass     | 24,530,179 | 145,646,218 | 124,675,827 | 109,509,816 |

**Table S3.** Biomass resources (million tonnes) by resource category, long-term (2040) scenario. Reported by price (\$ per tonne) at farmgate or forest roadside, i.e., after harvest but before delivery. Base-case scenario for agricultural resources, and medium housing, low-energy demand for forestland resources, from USDOE [1] downloaded from <https://bioenergykdf.net/bt16-2-download-tool/county>. County-level data from USDOE [1] downloaded from <https://bioenergykdf.net/bt16-2-download-tool/county> (continued)

| Resource category  | Resource                           | \$44        | \$66        | \$88        | \$110       |
|--------------------|------------------------------------|-------------|-------------|-------------|-------------|
| Logging residues   | Hardwood, lowland logging residues | 4,207,060   | 4,207,060   | 4,207,060   | 4,207,060   |
|                    | Hardwood, upland logging residues  | 3,086,554   | 3,086,554   | 3,086,554   | 3,086,554   |
|                    | Mixedwood logging residues         | 2,448,788   | 2,448,788   | 2,448,788   | 2,448,788   |
|                    | Softwood, natural logging residues | 7,433,366   | 7,433,366   | 7,433,366   | 7,433,366   |
|                    | Softwood, planted logging residues | 1,682,057   | 1,682,057   | 1,682,057   | 1,682,057   |
|                    |                                    |             |             |             |             |
| Whole trees        | Hardwood, lowland whole trees      | -           | 8,313,025   | 22,033,214  | 22,033,214  |
|                    | Hardwood, upland whole trees       | -           | 14,242,664  | 27,289,494  | 27,289,494  |
|                    | Mixedwood whole trees              | 34,517      | 2,160,734   | 2,332,032   | 2,332,032   |
|                    | Softwood, natural whole trees      | -           | 15,472,124  | 19,785,994  | 19,785,994  |
|                    | Softwood, planted whole trees      | -           | 14,868,874  | 14,934,793  | 14,934,793  |
|                    |                                    |             |             |             |             |
| Woody energy crops | Eucalyptus                         | -           | 849,640     | 566,630     | 470,314     |
|                    | Pine                               | -           | 107,618     | 15,468      | 3,468       |
|                    | Poplar                             | 7,694,059   | 40,691,264  | 37,467,006  | 42,242,718  |
|                    | Willow                             | 6,552,853   | 22,773,745  | 12,815,431  | 6,949,884   |
| Grand Total        |                                    | 117,006,286 | 606,970,735 | 771,443,821 | 822,867,213 |

### 3. Selecting sequestration basins and potential BECCS locations

OR-SAGE was used to identify areas within or near potential sequestration basins that meet specified BECCS siting constraints. Siting was also constrained post hoc considering the saline basins for CCS that have been assessed by the USGS. These geological formations have been categorized as Storage Assessment Units (SAU)s according to capacity, depth and location for the continental US and Alaska. (U.S. Geological Survey Geologic Carbon Dioxide Storage Resources Assessment Team 2013). The assessed formations are a subset of NOGA 2003, further constrained to have depths to the top of the SAU between 3000 and 13000 ft (914-3962) deemed both accessible and also sufficiently deep to prevent inadvertent release (Brennan et al. 2010; USEPA 2010). EPA 2010) Further criteria used in the analysis are given in Brennan et al. (2010) and include factors such as permeability and salinity of the formation water, amongst others.

The majority of SAUs have surface projection data provided on the USGS website linked to the assessment report. However, about a third of the formations are not published. For these sites, we had to return to the original NOGA maps and compare them with the GIS model described earlier. Details of SAU selection are given in the Appendix. The overlaying grid has a resolution of 15 square km, which means that the sites for BECCS power plants will be within 15 km of an injection site, namely those sites that are co-located with the GIS constraints the SAU assessments in USGS 2013. In addition, the power plants are constrained to be at least 50 miles (80 km) apart, as this appears to be



the distance in our simulations at which point plant proximity does not constrain our results. Future scenarios could relax this constraint and expand the geographic region for BECCS, taking into account transportation costs.

The result of the OR-SAGE model is a set of spatial areas that satisfy the criteria listed in Table 3. These areas are then discretized by overlaying a 15 meter x 15 meter grid, which results in a set of 4,061 potential power plant sites (Figure S1).

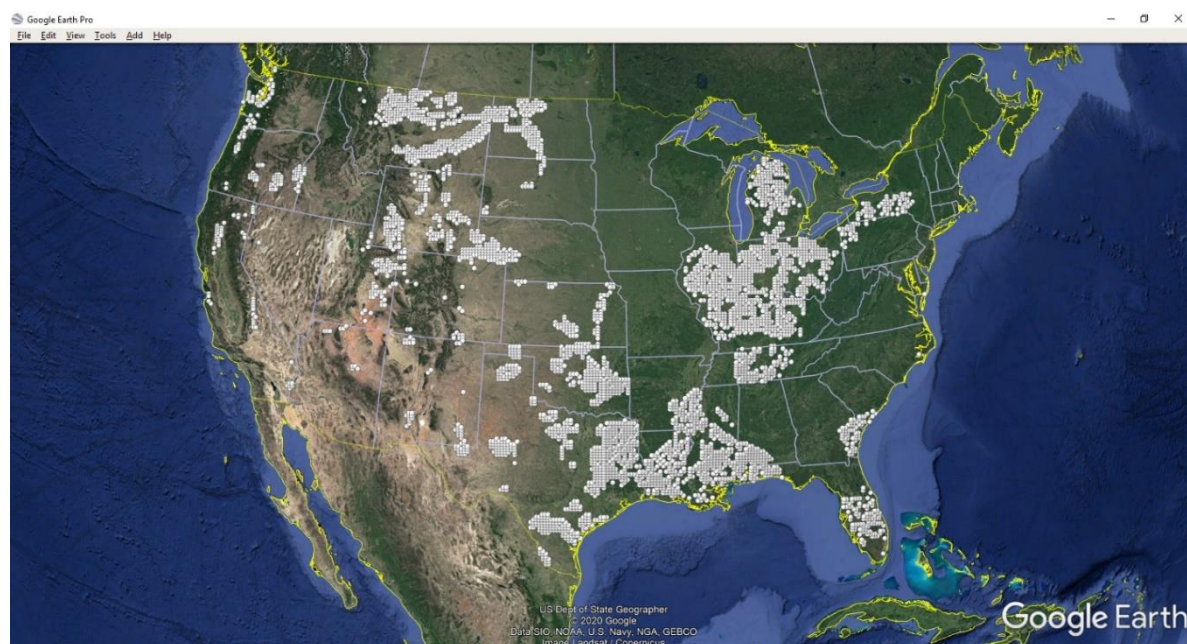

**Figure S1.** BECCS sites as selected in OR-SAGE.

These locations do not take into account the capability of the underlying geological formations to sequester the CO<sub>2</sub>. The 2013 USGS storage assessment analysis [2] provides information for a number of areas that could support sequestration (Figure S2).

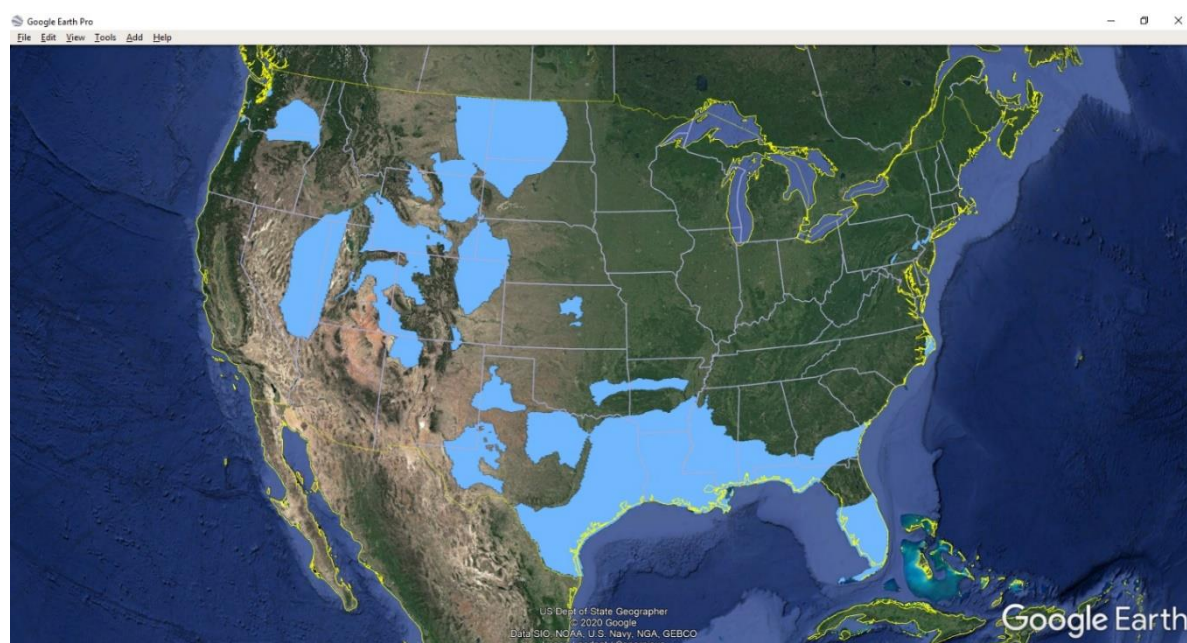

**Figure S2.** Basins identified in the USGS storage assessment [2].

For several of the areas, the assessment information has not been published. The province information from the USGS National Assessment of Oil and Gas Online [8] was used to provide

geographical regions that could be used until the storage assessment unit is published. The suitable areas were selected based on mean formation depth, from 900 to 3700 m, and on having sufficient permeability as indicated by the presence of extractable oil or natural gas. Hydrocarbon production is accompanied by the extraction of formation water, or brine, which provides a medium for capturing CO<sub>2</sub> below ground. Gas-only producing formations have lower permeabilities than mixed oil and gas producing formations, but are considered viable for CO<sub>2</sub> capture (USGS 2013). The depth criteria have been established to ensure that injection sites are sufficiently deep to prevent leakage to the surface, but are not so deep as to make the injection of CO<sub>2</sub> difficult and the cost prohibitive. The resulting areas are shown in Figure S3. This still did not provide information for the Illinois Basin, and so for that basin, the area chosen for storage was from the following formations: Post-New Albany, Hunton, and Middle and Upper Ordovician Carbonate (Figure S4). The potential power plant sites from Figure S1 were then overlaid onto these regions to determine which sites would allow for sequestration without the need for piping the CO<sub>2</sub> to reach a suitable sequestration point. This resulted in 2,857 suitable sites (Figure S5). However, running BILT (a mixed integer programming model) on this many sites would overwhelm the model and preclude it from running to optimality in many cases, so this set was further reduced by thinning. The desired result of this thinning process was to obtain a subset of sites that spanned the same regions as the original set, but would allow BILT to run in a reasonable amount of time.

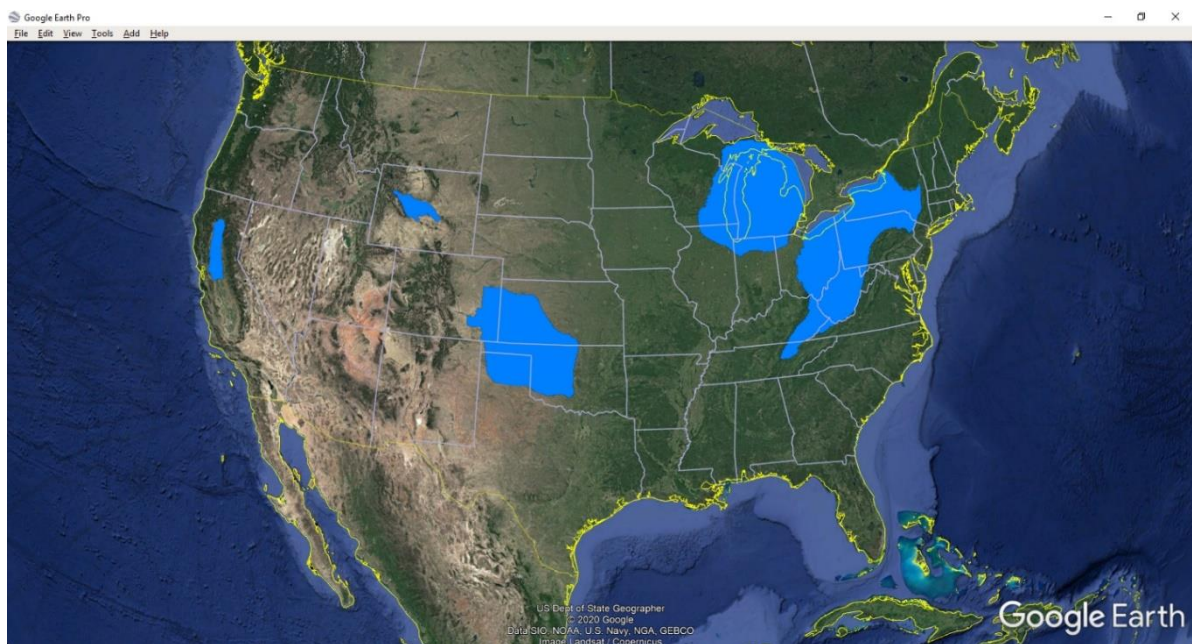

**Figure S3.** Basins identified in the USGS National Assessment of Oil and Gas Online [8].



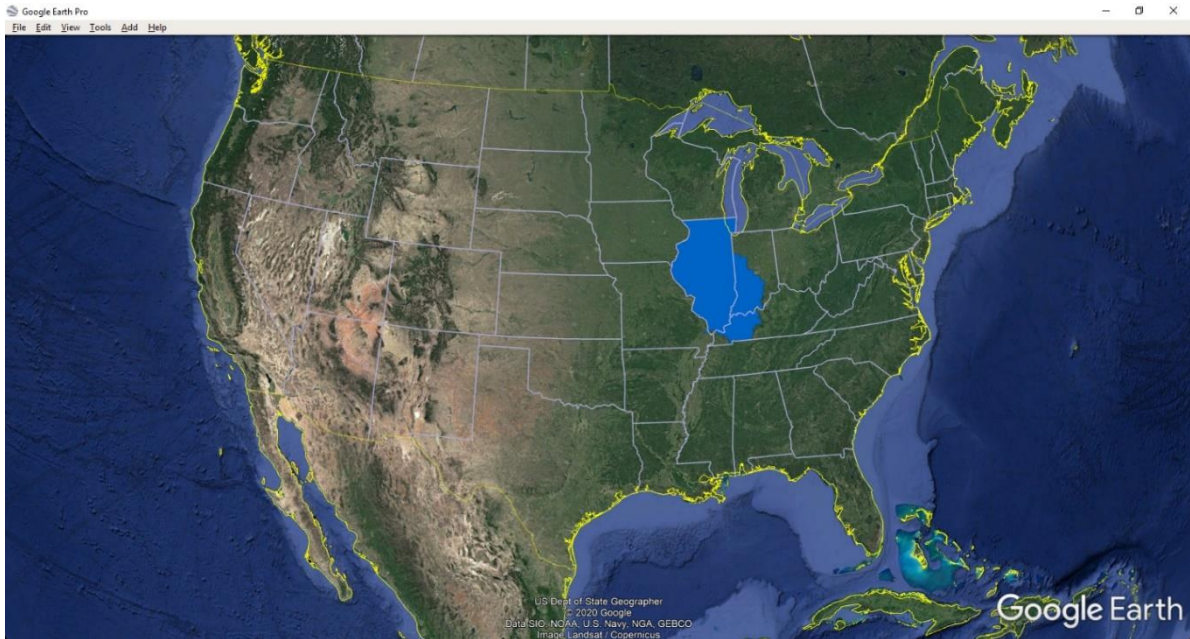

**Figure S4.** Post-New Albany, Hunton, and Middle and Upper Ordovician Carbonate formations.

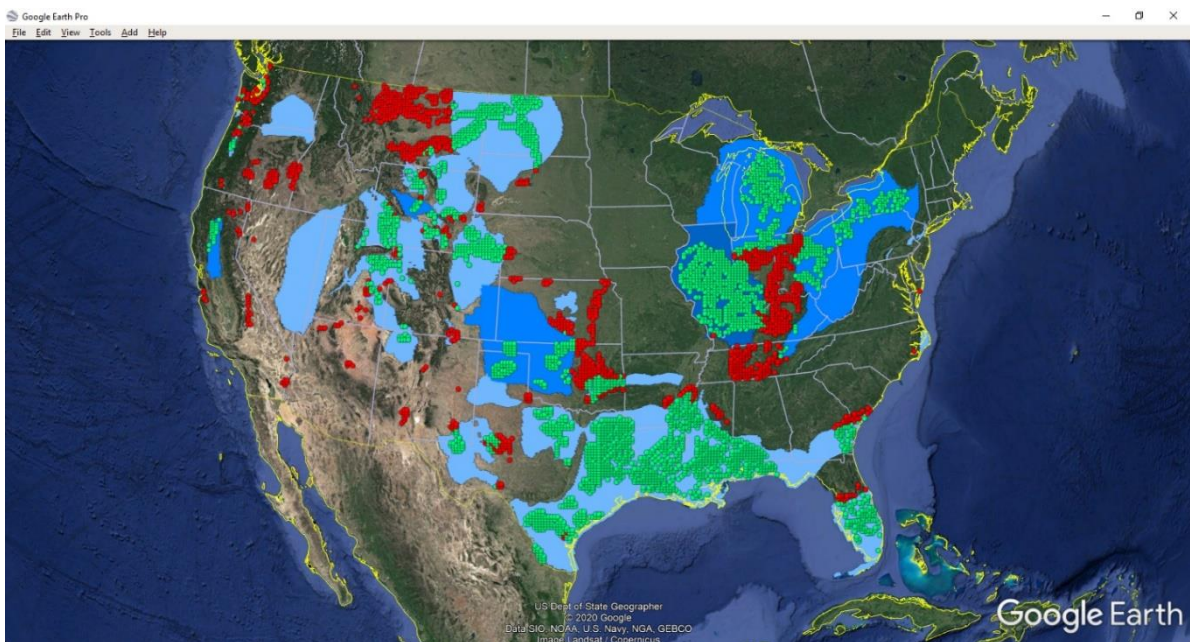

**Figure S5.** Potential power plant sites from Figure S1 overlaid potential sequestration basins.

The algorithm used to develop this smaller subset of potential power plant sites began by choosing the site that was located the furthest from any other site. This site was placed in set  $S$ . At each iteration of the process, the algorithm chose the site not in  $S$  that was the furthest from any site that was already in  $S$ . The process stopped when the site to be added was within a distance,  $d$ , from a site already in  $S$ . Larger values of  $d$  resulted in smaller subsets, and smaller values of  $d$  in larger subsets. The subset of 72 sites that results from a value of  $d = 160$  km is shown in Figure S6. R-results for  $d = 121$  km and  $d = 80$  km are shown in Figure S7 and Figure S8 producing 103 and 173 sites respectively. When BILT is run, by giving it more potential sites to choose among, the greater the confidence that it has chosen an optimal. Thus, the simulation of  $d = 80$  km was used in the analysis.



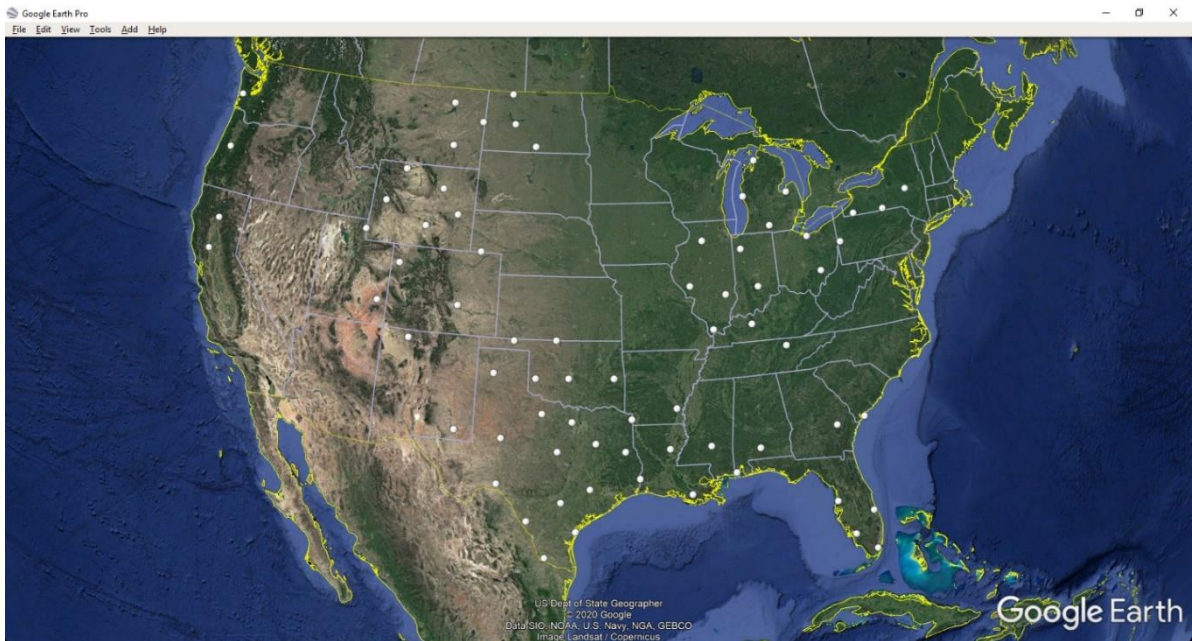

**Figure S6.** Potential sites thinned to distances of 160 km.

For  $d = 75$  miles, the resulting set has 103 sites, and is shown here:

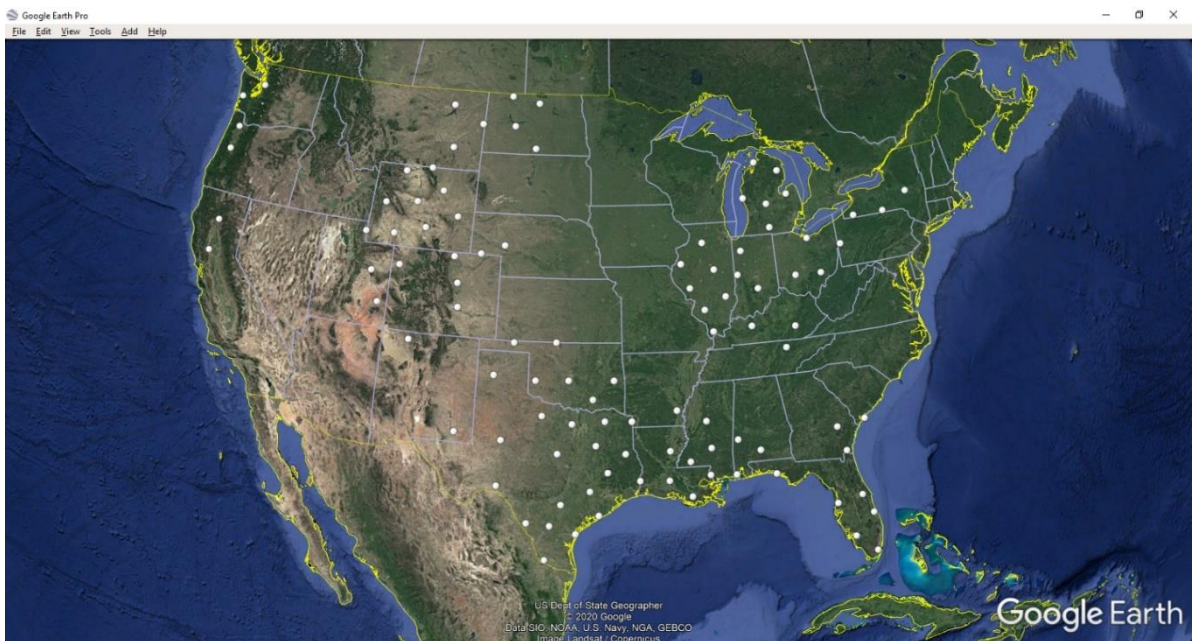

**Figure S7.** Potential sites thinned to distances of 121 km (103 sites).

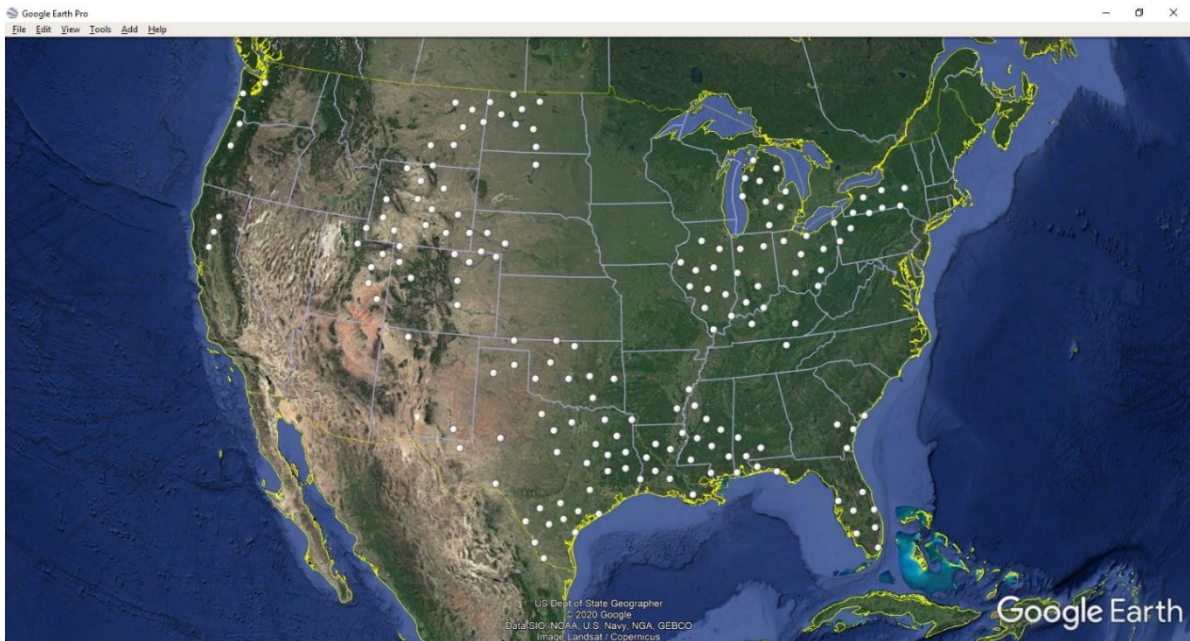

**Figure S8.** Potential sites thinned to distances of 80 km (173 sites).

#### 4. Injection wells and underground storage of CO<sub>2</sub>

CO<sub>2</sub> is typically injected as a supercritical fluid to increase its density to 600 kg/m<sup>3</sup>, which reduces its buoyancy in the formation and increases the capacity of the formation. CO<sub>2</sub> captured from power production is compressed to a supercritical state and is transported to the injection site by pipeline, tanker truck, or ships.

The Environmental Protection Agency defined rules for injection wells for geologic sequestration of CO<sub>2</sub>, Class VI wells, in 2010 [9] under the Safe Drinking Water Act (SDWA). The document provides minimum requirements that address: siting, construction, operation, testing, monitoring and closure. These requirements are to protect underground sources of drinking water. CO<sub>2</sub> has attributes that lead to specific requirements for underground injection: CO<sub>2</sub> is buoyant, mobile within the subsurface, corrosive when wet, and is a good solvent for a number of contaminants. CO<sub>2</sub> is expected to be injected in large volumes proximate to gas generation, larger than has been demonstrated in Enhanced Oil Recovery operations. Although all of these factor into costs of injection, for the purposes of the report, the geographical location relative to biopower installations and the capacity and injection rate are the factors that will be used to compare CCS from biopower versus that from other sources (steel and cement production, gas or coal fired generation). Injection of CO<sub>2</sub> into oil fields for advanced oil recovery are governed by a separate set of rules.

The costs of injection of CO<sub>2</sub> into sedimentary rocks has been estimated as \$7-13 t/CO<sub>2</sub> (2013 dollars) in the US. The range arises from attributes of the formation (depth, etc.) as well as land use, the number of injection wells, and requirements for monitoring.

##### i) Locations:

Underground injection is regulated by individual states. Those that have primacy under the SDWA can issue their own Class VI permits. Otherwise the Class VI permits are directed to the EPA regional authority, listed in Table S4. In certain states and tribal territories, tribal authorities authorize the permit. Although states have the opportunity to apply for primacy, it appears that this is being handled by the federal agency for all states except North Dakota [10]. The ND rule was approved on April 24, 2018. North Dakota made the application to support the bioenergy industry in general in the state, and specifically Red Trail Energy in development of CCS at its ethanol facility in Richardton. The application was supported by industry and academics alike [11], including the Energy and Environmental Research Center at the University of North Dakota, the Center for Carbon Removal and the Plains CO<sub>2</sub> Reduction (PCOR) Partnership.

**Table S4.** Responsibility for Class VI injection wells (November 2018).

| <b>EPA Region</b> | <b>States</b>                            | <b>Contacts</b>                                                                                                                                                                                       |
|-------------------|------------------------------------------|-------------------------------------------------------------------------------------------------------------------------------------------------------------------------------------------------------|
| R1                | CT, ME, MA, RI, NH, VT                   | No class VI wells                                                                                                                                                                                     |
| R2                | NJ, NY, Puerto Rico, US Virgin Is.       | Nicole Kraft, kraft.nicole@epa.gov, 212-637-3093                                                                                                                                                      |
| R3                | PA, VA, WV, 7 tribes                     | Nobody specific for class VI                                                                                                                                                                          |
| R4                | AL, FL, GA, KY, MS, NC, SC, TN, 6 tribes | Larry Cole, cole.larry@epa.gov, 404-562-9474                                                                                                                                                          |
| R5                | IL, IN, MN, OH, WI, 35 tribes            | Andrew Greenhagen, greenhagen.andrew@epa.gov, 312-353-7648                                                                                                                                            |
| R6                | AR, LA, NM, OK, TX, 66 tribes            | Brian Graves, graves.brian@epa.gov, 214-665-7193                                                                                                                                                      |
| R7                | IA, KS, MO, NE                           | R7_uic_program@epa.gov                                                                                                                                                                                |
| R8                | CO, MT, ND, SD, UT, WY, 26 tribes        | EPA except for ND, EPA contact is Wendy Cheung, cheung.wendy@epa.gov, 303-312-6242<br>latter is ND Industrial Commission, <a href="https://www.dmr.nd.gov/oilgas/">https://www.dmr.nd.gov/oilgas/</a> |
| R9                | AZ, CA, HI, NV, Pacific territories      | Nobody specific for class VI                                                                                                                                                                          |
| R10               | AK, ID, OR, WA                           | Nate Fischer, natefischer@idwr.idaho.gov, Derek Sandoz, Sandoz.derek@deg.state.or.us<br>Mary Shaleen Hansen, maha461@ecy.wa.gov                                                                       |

157

158 ii) Types:

159 EPA regulations cover Class VI wells, as well as those Class I, II, or V, wells that are converted  
 160 to Class VI wells for geologic sequestration. Because of the physical and chemical nature of CO<sub>2</sub>,  
 161 regulations have been imposed for site characterization, well construction materials and ruggedness  
 162 over the lifetime of the well.

163 CO<sub>2</sub> is injected in a permeable formation: sandstone or carbonate (dolomite, limestone), or  
 164 mixtures. Downhole, the CO<sub>2</sub> will move and eventually be trapped by physical and geochemical  
 165 processes that have been reviewed by Benson and Cole (2008) [12]. Injected CO<sub>2</sub> will rise in the  
 166 formation until it contacts an impermeable layer. It will also reside in formation pores, perhaps as  
 167 individual bubbles or droplets separated from the main plume by capillary forces. CO<sub>2</sub> can also  
 168 dissolve into groundwater or hydrocarbons, and can reprecipitate as carbonate minerals. Finally, CO<sub>2</sub>  
 169 can adsorb to organic-rich lithography displacing methane or other hydrocarbons, which is the  
 170 reason why it is used for EOR. The nature of the reservoir will determine the relative rates of these  
 171 processes and the suitability for long-term CO<sub>2</sub> sequestration. Attributes that either are advantageous  
 172 or disadvantageous are given in

Table S5.

Assessment of the reservoirs was done using multi-scale physical models covering time scales from milliseconds to thousands of years. Data for these models have come from laboratory experiments, which are not on the same scale, and model results have to be extrapolated beyond where they can be validated. Data on the subsurface geology is typically very scanty, requiring a geostatistical approach. Development of better tools to model CCS is ongoing, but because the models are not fully predictive, monitoring of CCS wells is of great importance.



**Table S5.** Attributes of Geologic Reservoirs for CO<sub>2</sub> Sequestration.

| <b>Advantageous</b>                                                                                                                                                                                        | <b>Disadvantageous</b>                                                                                                                                                                                                                                                     |
|------------------------------------------------------------------------------------------------------------------------------------------------------------------------------------------------------------|----------------------------------------------------------------------------------------------------------------------------------------------------------------------------------------------------------------------------------------------------------------------------|
| Being close to source of production<br>(harvested forest residues associated with paper production, crop stover and agriculture residue, organic waste, and marginal farmland designated for energy crops) | Being far from production                                                                                                                                                                                                                                                  |
| Injection layer is porous – allows rapid injection rate (~1 million tonnes /year)                                                                                                                          | A tight formation, unless hydraulically fractured shales, means that injection rate is much lower.                                                                                                                                                                         |
| Capacity 50-100 million tonnes/project                                                                                                                                                                     | Lower capacity reduces economic feasibility                                                                                                                                                                                                                                |
| Intact caprock (e.g., shale)                                                                                                                                                                               | Migration pathways upwards: faults, fractures                                                                                                                                                                                                                              |
| Few penetrations from surface to disposal strata                                                                                                                                                           | Legacy wells that may have improper construction or inadequate plugging                                                                                                                                                                                                    |
| Dry formation                                                                                                                                                                                              | Wet, allows CO <sub>2</sub> to dissolve, producing a corrosive solution that will flow with groundwater. Leaching of heavy metals is also possible                                                                                                                         |
| Dissolved CO <sub>2</sub> beneficial if it happens under conditions favorable to the formation of stable carbonate minerals                                                                                |                                                                                                                                                                                                                                                                            |
| Far away from drinking water reservoirs                                                                                                                                                                    | Proximity to drinking water reservoirs may lead to contamination (with CO <sub>2</sub> ) because of the pressures used for injection. However, unlike fossil-energy produced CO <sub>2</sub> , bioenergy plants will not co-produce H <sub>2</sub> S or mercury compounds. |
| Deep formation (>800 m)                                                                                                                                                                                    | Shallow formation (<800m)                                                                                                                                                                                                                                                  |
| In situ mineralization (olivine, pyroxene), basaltic lavas and ultramafic rocks                                                                                                                            | Long distance from suitable formation, availability of rock formation. Changes in properties of the rock formation during injection create uncertainty: permeability, surface area, and changes in reaction rate through passivation.                                      |

182

183

184

185

186

187

188

Currently, biomass resources are concentrated around the eastern, western, and northern perimeter of the US, the upper Midwest and northern prairies (ND) and in states along with Mississippi River. The question is where these sources of biomass are close to areas acceptable for CO<sub>2</sub> injection. Some of these technologies have been developed for CCS of CO<sub>2</sub> from coal production funded by the US Department of Energy [13], particularly in saline aquifers and in advanced oil recovery [14].

189

**Table S6.** Operating CCS in 2018.

| <b>Bioenergy process<br/>(or other as noted)</b> | <b>Location/geology</b>                             | <b>Amount (million tonnes/year)</b>                   |
|--------------------------------------------------|-----------------------------------------------------|-------------------------------------------------------|
| CO <sub>2</sub> (g) from ethanol (ADM)           | Decatur, IL<br>Mt. Simon Sandstone saline formation | 0.9-1.0 starting in 2017                              |
| Biochar                                          | Soil amendment - dispersed                          | 39-77 t/y US<br>1.9-7.3 t/y Canada                    |
| Water saturated CO <sub>2</sub>                  | Wallula, WA<br>In-situ mineralization (828-886m)    | 977 tons                                              |
| Fossil energy production                         | US depleted oil reserves, EOR                       | 64<br>21 (from captured atmospheric CO <sub>2</sub> ) |

190

191     iii) Injection rates

192         The injection rate will depend on the trapping mechanism for CO<sub>2</sub>. There are four known  
193     phenomena that retain CO<sub>2</sub> underground [15].

- 194         1. Cap rock prevents migration of buoyant CO<sub>2</sub>
- 195         2. The injected CO<sub>2</sub> dissolves into the formation brine. The brine becomes denser than non-CO<sub>2</sub>  
196         brines but CO<sub>2</sub> can migrate with groundwater.
- 197         3. Mineralization provides the most stable retention of CO<sub>2</sub>; however, it make take ~10,000s of  
198         years to complete. Storage can last for 100,000s of years
- 199         4. Residual trapping is a process that takes place over days to months that can hold CO<sub>2</sub> over  
200         tens of years. Residual trapping depends on the relative permeability of CO<sub>2</sub> and residual gas  
201         saturation, or the fraction trapped in pore spaces.

202         Successful injection of CO<sub>2</sub> will require a reservoir of sufficient permeability, for instance 1  
203     million tonnes/year. If the formation cannot handle the influx of CO<sub>2</sub> the pressure will rise beyond  
204     accepted levels and may result in a geomechanical deformation. The injection rate will be important  
205     if a reactive process needs to take place, such as in-situ mineralization. For the Wallula injection site,  
206     the CO<sub>2</sub> mineralization rate was 0.04 wt%/year, but this will depend on the characteristics of the  
207     formation.

208     iv) Injection capacities

209         A review by Dooley (2008) [16] estimated the geologic sequestration capacity in the US could be  
210     over 3500 Gt CO<sub>2</sub> with 95% of the largest conventional stationary sources only 50 miles from  
211     appropriate injection sites. The EPA assumes that CCS injection will be to depths greater than 800 m  
212     to maximize capacity and longevity of storage. According to the negative emissions report, the US  
213     consumes 100 EJ primary energy annually, or about the equivalence of 6.5 Gt CO<sub>2</sub>. However, 1 Gt dry  
214     biomass is equivalent to 1.4 Gt CO<sub>2</sub> and 14 EJ according to the National Academies of Sciences,  
215     Engineering, and Medicine [17]. If the US was to assume its share of the IEA mandate for geologic  
216     sequestration, that would be ~2.1 Gt CO<sub>2</sub> sequestered annually by 2050, or CO<sub>2</sub> from the burning of  
217     1.4 Gt biomass. The estimates for BECCS production in 2050 range from 522-1,500 million tonnes/year.  
218     A more realistic value for storage capacity of CO<sub>2</sub>, with minimal effect on current land or water use  
219     is 6-17 Gt CO<sub>2</sub> by 2040. Enhanced oil recovery could take 30 Gt of CO<sub>2</sub>. Hence, the ability to sequester  
220     CO<sub>2</sub> appears to comprise a small fraction of the overall capacity for CO<sub>2</sub> in the US subsurface.

221         Key to the viability of CO<sub>2</sub> injection though, is the proximity of the point of generation to the  
222     point of injection and the capacity of the proximate injection sites. The USGS assessed the framework  
223     for CO<sub>2</sub> injection across the US [18,19]. As part of this analysis, they considered the size of the  
224     formation, its porosity and permeability, and the presence of water or brine. These formations cover  
225     large areas of the US, but the distribution of capacity is not even. The mid continent and Alaska have  
226     much more capacity than coastal regions. The USGS also gives figures for the lands being federal,  
227     state, tribal, or privately owned, and the percentage off-shore. Who governs, owns access or has  
228     mineral rights to the land all affect the feasibility of injection, especially as sequestration sites may  
229     extend over 100 km<sup>2</sup>. The USGS analysis found that formations off the Gulf Coast have the largest  
230     capacity for CO<sub>2</sub> injection, an estimated 1,800,000 million tonnes. The USGS estimates are highly  
231     dependent on the porosity and permeability of the formations, the porosity governing the capacity  
232     and the permeability governing the injection rate.

233     v) Costs

234         Costs have been evaluated for storage from ZEP 2019 [20]. Phases of storage include:

- 235         1. Exploration – not needed for DOGF, characterization, permitting, injection tests (\$1m Euro)
- 236         2. Building facility – not needed for DOGF, development plan.
- 237         3. Injection, measure, monitor, and verify (4D seismic), highest risk
- 238         4. Closure – monitofring (targeted wells) and verification, liability fund. Decommissioning site

Storage costs are sensitive to the following: field capacity, well capacity (injectivity x lifetime of well), liability, well completion, depth, SACC, number observation wells, number exploration well. The variability in cost is mostly due to constraints in field capacity and well injectivity – the latter dictating the number of injectors. In general off-shore storage has been found to be more expensive, however, the brine reservoirs in the nearshore Gulf of Mexico have capacities that dwarf onshore formations. Well monitoring needs to cover well integrity, the injection of the CO<sub>2</sub>, and its storage over the lifetime of the well, as well as groundwater quality in adjacent reservoirs during and after injection activities.

Regulations also ensure that injection sites have funds to cover monitoring and maintenance over the lifetime of the well. Record keeping is stipulated to assist emergency response if it is required and an ongoing environmental assessment of the area groundwater.

Various methods can be used to monitor CO<sub>2</sub> reservoirs [21]. Plumes of CO<sub>2</sub> injected underground can be followed by seismic imaging. Tracer gas, such as a freon, can be injected along with the CO<sub>2</sub>. These non-natural gases can be detected at very low concentrations, to serve as a warning if the injected CO<sub>2</sub> has leaked into adjacent reservoirs, such as those that contain groundwater, or into monitoring wells. A water-soluble dye, fluorescein, has also been used. Monitoring C-12 to C-13 ratios gives an indication of the provenance of CO<sub>2</sub> in a formation or in an aquifer. CO<sub>2</sub> from biomass will have a different isotopic ratio than from burning fossil fuel.

Pressure sensors can be deployed in the injection well, as well as nearby monitoring wells. Pressure gives the response of the reservoir to the injected CO<sub>2</sub> as well as leakage into aquifers. Pressures that result in geomechanical events can be observed by interferometric synthetic aperture radar (In SAR) satellite images. Geophones that pick up seismic events can also be used as diagnostic tools. Induced seismicity can be problematic in certain injection sites.

#### 4.1 Basin Capacities and Injection Costs.

Results from the BILT model gave locations of BECCS facilities with respect to possible injection sites located within 15 km of each power plant. These facilities have a range of sizes as has been discussed earlier, which translates to a range of CO<sub>2</sub> production values for capture and storage. The yearly average production of CO<sub>2</sub> for each of the BECCS facilities that were adjacent to a storage site were summed. Thus, the lifetime of the injection sites was computed based on this same production rate continuing indefinitely. The site lifetimes are shown in **Table S7** below. Although the lower CO<sub>2</sub> projection scenarios produced much less CO<sub>2</sub> per annum, they also access far fewer sites. Thus, even the highest loadings of CO<sub>2</sub> can accommodate BECCS facility lifetimes of a few decades. The issue with the highest CO<sub>2</sub> production rates is that marginal injection sites are more likely to be accessed, for instance those with reduced permeability such as tight gas formations.

**Table S7.** Formation Lifetimes (years) as a Function of BECCS Scenario.

| NOGA formation | 10%  | 20%   | 30%  | 40%  | 50%  | 60%  | 70%   | 80%  | 90%  | 99%  | 100%  |
|----------------|------|-------|------|------|------|------|-------|------|------|------|-------|
| C5004          |      |       |      |      |      | 1338 | 1554  | 1202 | 798  | 1131 | 1002  |
| C5020          |      |       |      |      |      |      | 236   |      |      |      | 1340  |
| C5021          |      |       |      |      |      |      |       |      |      |      | 15157 |
| C5022          |      |       |      |      |      |      |       |      |      |      | 892   |
| C5030          |      |       |      |      |      |      |       |      |      | 49   | 51    |
| C5031          | 3288 |       | 3241 | 6014 | 1680 | 1320 | 3409  | 2595 | 1945 | 1707 | 1628  |
| C50310101      |      | 2612* |      |      |      |      |       |      |      |      |       |
| C50310102      |      | 30547 |      |      |      |      |       |      |      |      |       |
| C5033          |      |       |      |      |      |      | 1403  |      | 671  | 1092 | 1037  |
| C5034          |      |       |      |      |      |      |       | 1072 |      | 32   | 107   |
| C5036          |      |       |      |      |      |      |       |      |      |      | 28698 |
| C5037          |      |       |      |      |      |      | 13373 |      |      |      | 16094 |
| C5039          |      |       | 450  | 450  | 225  | 148  | 75    | 87   | 50   | 57   | 50    |

**Table S7.** Formation Lifetimes (years) as a Function of BECCS Scenario (continued).

| NOGA<br>formation | 10%   | 20%   | 30%   | 40%   | 50%   | 60%   | 70%   | 80%   | 90%  | 99%   | 100%  |
|-------------------|-------|-------|-------|-------|-------|-------|-------|-------|------|-------|-------|
| C5043             | 236   | 242   |       | 243   | 242   | 236   | 235   | 229   | 230  | 231   | 232   |
| C5044             |       |       | 7339  |       |       |       | 7125  | 3486  | 3496 | 3434  | 3378  |
| C5045             |       | 1852  |       | 625   | 460   | 455   | 455   | 455   | 455  | 608   | 459   |
| C50475049         | 55875 | 23686 | 19015 | 15692 | 12395 | 10720 | 9383  | 7419  | 7995 | 7395  | 7075  |
| C50490117         | 3303* |       |       |       |       |       |       |       |      |       |       |
| C5050             |       |       | 18504 | 19587 | 18861 | 17614 | 18341 | 17792 | 2250 | 17194 | 23725 |
| C5062             |       | 863   | 299   | 308   | 298   | 295   | 285   | 290   | 289  | 296   | 296   |
| C5070             |       | 1644  | 1446  | 821   | 802   | 653   | 534   | 486   | 428  | 423   | 420   |
| C5009             |       |       |       |       |       |       | 6470  | 406   |      |       | 6984  |
| C5035             |       |       |       |       |       |       | 11696 |       |      |       |       |
| C5058             | 1712  | 1464  | 1415  | 1225  | 895   | 1011  | 876   | 870   | 875  | 874   | 876   |
| C5063             |       |       | 3571  | 3585  | 3570  | 1720  | 1656  | 813   | 653  | 485   | 534   |
| C5067             |       | 187   | 2161  | 805   | 773   | 424   | 304   | 270   | 209  | 181   | 170   |
| C6401, 2, 4       | 4487  | 2287  | 2339  | 1689  | 1651  | 1193  | 1252  | 1089  | 1101 | 1088  | 1090  |

The cost of drilling an injection well has been based on those associated with oil and gas production, as these sites have been shown to have characteristics needed for CO<sub>2</sub> storage (USGS 2010). The cost of each well site has been determined using the formula provided by Lukawski, *et al.* [22], who fit API Joint Association Survey data between 1976 and 2009 and normalized costs to 2009 US\$. We adjusted these 2009 costs to 2018 costs, as described elsewhere in this manuscript. The costs for each scenario are shown in the figure below. Although the overall drilling costs increase with the number of wells being drilled, and thus with the amount of CO<sub>2</sub> being injected, it is apparent that the costs for the 20-60% scenarios and the 70-90% scenarios are fairly flat. This suggests that the wells are equipped to accommodate higher production rates of CO<sub>2</sub>, rather than more wells being drilled as one goes from 70-90% CO<sub>2</sub> for instance. Costs for drilling increase exponentially at 100% CO<sub>2</sub> production, as more marginal wells need to be accessed.

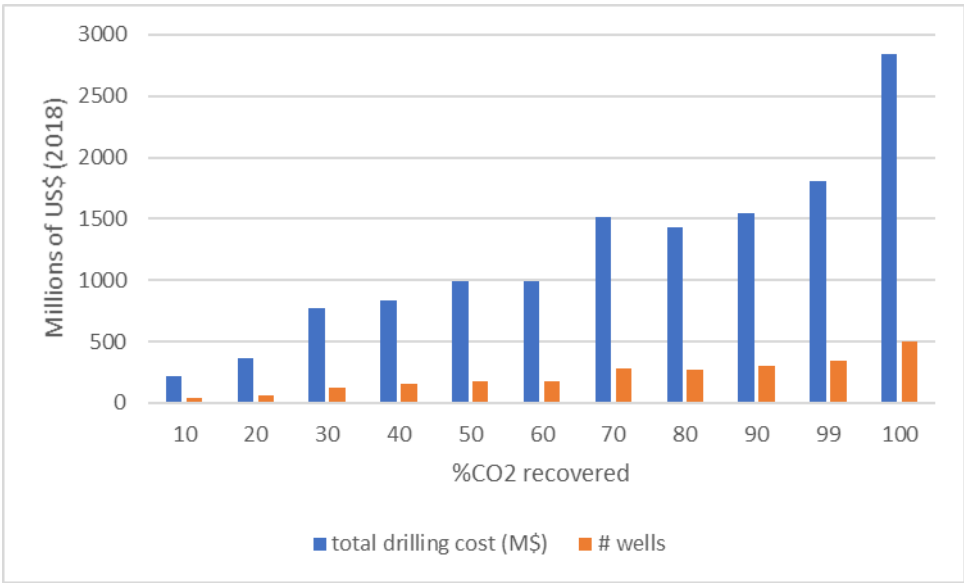

**Figure S9.** Injection cost and number of wells as a function of percent BECCS implemented.

4.2 Coal retirement:

Electric Utilities have been retiring hundreds of aging coal plants since 2010. The cost of building renewables, such as, wind (which has declined more than 40% in the same time period) and solar



(which has declined more than 80% in the same time period), and having natural gas prices at historic lows as a result of the fracking boom is seeing coal plants being retired across the country. This has been further aggravated with the demand for electricity sharply falling in the spring of 2020, due to the nationwide shutdown to slow the spread of the Corona Virus.

With coal plants becoming more costly to operate than gas turbines and other renewables, utilities are pushing coal plants down the unit commitment dispatch stack. In the first four months of 2020, the US fleet of wind, solar and hydro generations have produced more electricity than coal on 90 separate days, shattering 2019's record of 38 days for the entire year. On May 1, 2020 in Texas and the ERCOT grid, wind generation supplied nearly three times as much electricity as coal did.

The latest report from DOE's Energy Information Administration (EIA) estimates that the US's total coal consumption will fall by nearly one quarter this year. Coal generation is estimated to provide just 19% of the nation's electricity in 2021, dropping for the first time below both Nuclear and Renewable generation. Renewables generation include – wind, solar, hydro, geothermal and biomass. Natural gas plants, which supplies 38% of the nation's electrical generation, is expected to hold the same output in the coming years due to low fuel prices.

EIA expects the US's emissions to fall an additional 11% (the largest drop in the last 70 years). This is driven partly by the new culture of "Work from Home" persisting, but more importantly because coal generation is being dispatched onto the grid less often. If coal does manage to beat expectations and rebound in the second half of the year, the dramatic shift in consumer behavior is unlikely to bring coal generation back into the mix. Duke Energy in the Southeast and Xcel Energy in the Midwest are in the process of retiring four dozen coal power plants by 2025 and no new coal facility are being built and commissioned. Coal is no longer considered "baseload" to the grid, a majority of which is covered by natural gas and nuclear generation. Natural gas additionally acts as a "hedge" to intermittent and uncertain generation resources such as wind and solar. For now, coal generation is expected to see a moderate rebound next year, as natural gas price keep low because of warm winter forecasts and reduced demand for gas heating.

## **5. Power generation assumptions**

Power generation and associated CO<sub>2</sub> emissions, sequestration, costs, and power generation were modeled using the Integrated Environmental Control Model (IECM) [4]. Key modeling assumptions for the pulverized combustion (PC) system and the integrated gasification combined cycle (IGCC) system are described below. Using powerplant location, powerplant sizing, feedstock flow rates, and feedstock price outputs from the BILT model, the IECM model was used to calculate the following economic parameters: O&M costs (M\$ per yr), annualized capital costs (M\$ per yr), net power produced (MW), and revenue required to breakeven (\$ per MWh). The chemical composition and energy density of the feedstock outputs from BILT were calculated by taking the weighted average of the composition and higher heating value data from the Phyllis biomass database [23].

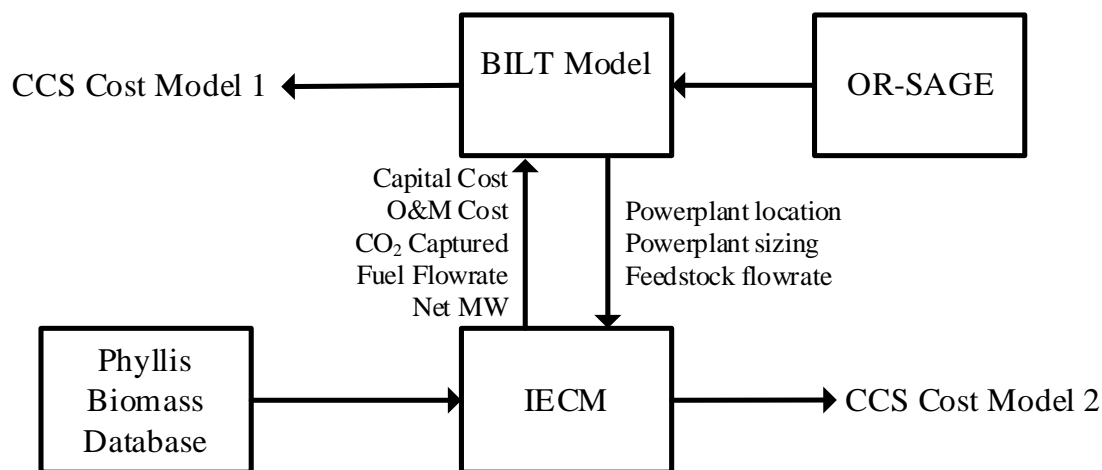

**Figure S10.** Logical pathway to BECCS cost calculations.

### 5.1 Pulverized Combustion

Pulverized coal (PC) powerplants can be converted to handle pelletized biomass feed [24]. Thus, the IECM was used to model PC powerplants running on pelletized biomass feed. The cost of building the powerplants is accounted for by IECM. The powerplants include the following emissions control technologies: post combustion CCS (using monoethanolamine, MEA), SO<sub>x</sub> and NO<sub>x</sub> control (using wet scrubbing and hot-side SCR), mercury control (using carbon injection), and particulates control (using cold-side electrostatic precipitation). The main units requiring specification in the base plant include the boiler, furnace, pulverizer, and steam cycle. Figure S11 presented below illustrates typical boiler performance on IECM.

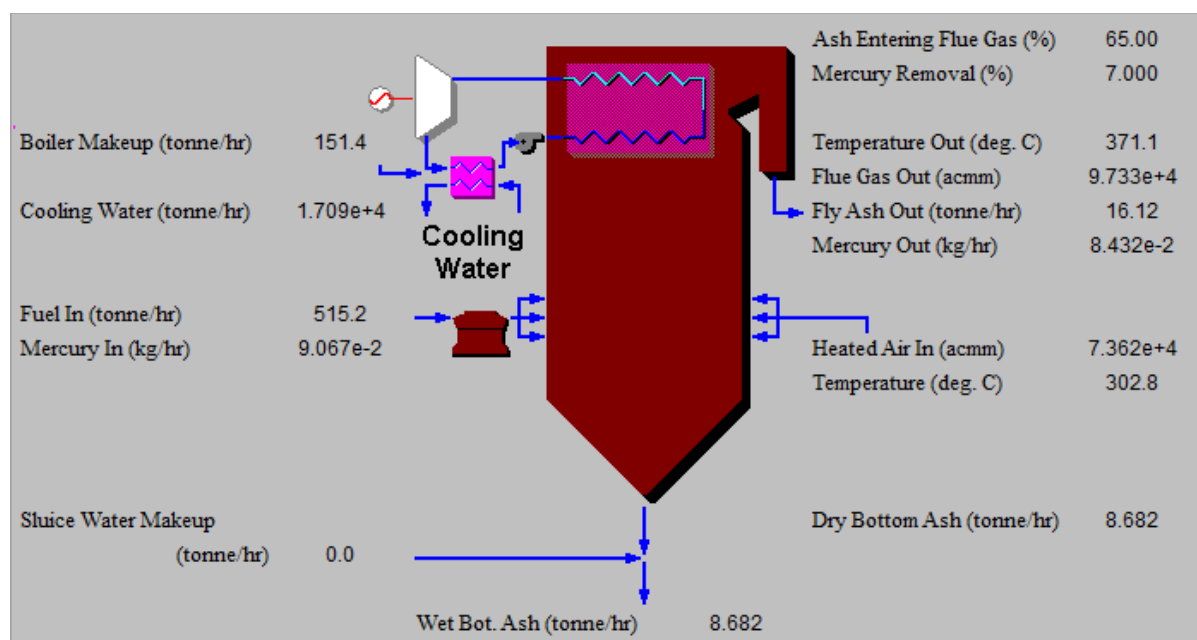

**Figure S11.** Example process flow diagram of a boiler on IECM [4].

The PC powerplants were modeled with the goal of capturing, transporting, and storing 90% of incoming CO<sub>2</sub> using chemical absorption with MEA. The capture was modelled using 30 wt% MEA which has a regeneration heat requirement of 4722 kJ/kg CO<sub>2</sub>. The captured CO<sub>2</sub> is compressed to 13.79 MPa and then transported 100 km for storage in saline aquifers. Figure S12 illustrates typical performance of the absorption column containing MEA.

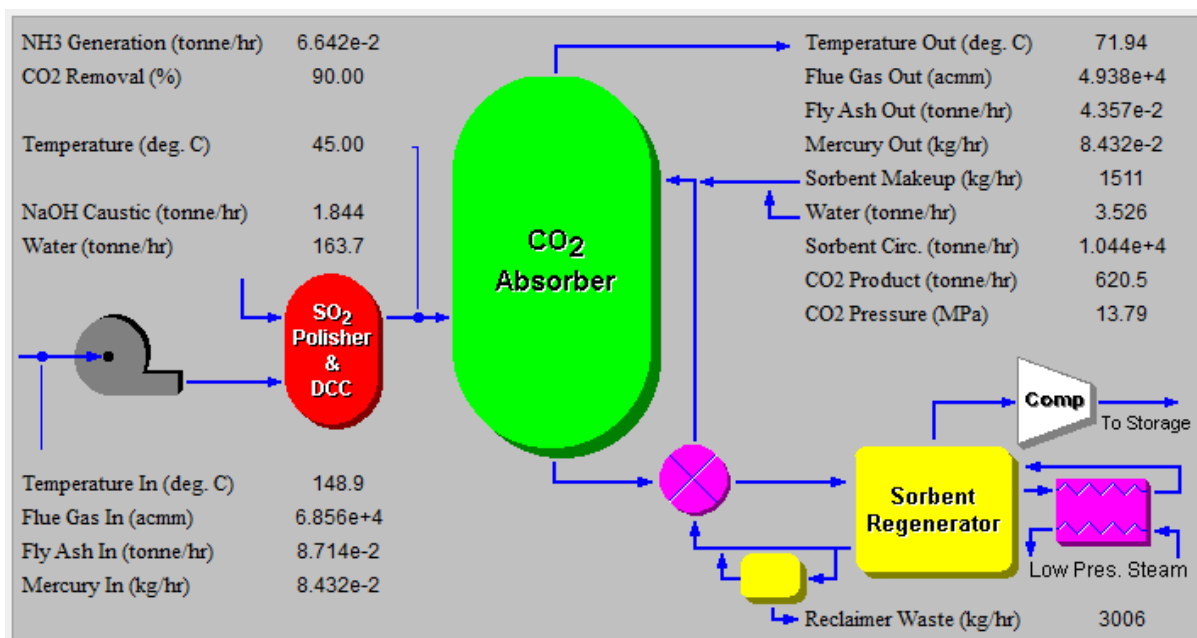

Figure S12. Example process flow diagram of CO<sub>2</sub> capture in a PC powerplant on IECM [4].

Values of parameters used in the simulations are shown in the tables below.

## 5.2 Integrated gasification combined cycle

Integrated Gasification Combined Cycle (IGCC) powerplants can run on pelletized and non-pelletized fuel [25]. IECM was used to simulate IGCC powerplants with pre-combustion CCS and H<sub>2</sub>S control using Sour Shift + Selexol. The main units requiring specification in the base plant include the following: air separation unit, GE gasifier, sulfur removal unit (Selexol), CO<sub>2</sub> removal unit (Selexol), gas turbine (GE 7FB), air compressor, and combustor.

IGCC powerplants were modelled with 90% CO<sub>2</sub> removal and 94% H<sub>2</sub>S removal in the Selexol process (Figure S13). The sour shift was favored over the sweet shift (in the sour shift, carbon is removed before sulfur) due to its lower steam demand [26]. Like with PC powerplants, the captured CO<sub>2</sub> is compressed to 13.79 MPa, transported 100 km and then stored underground.

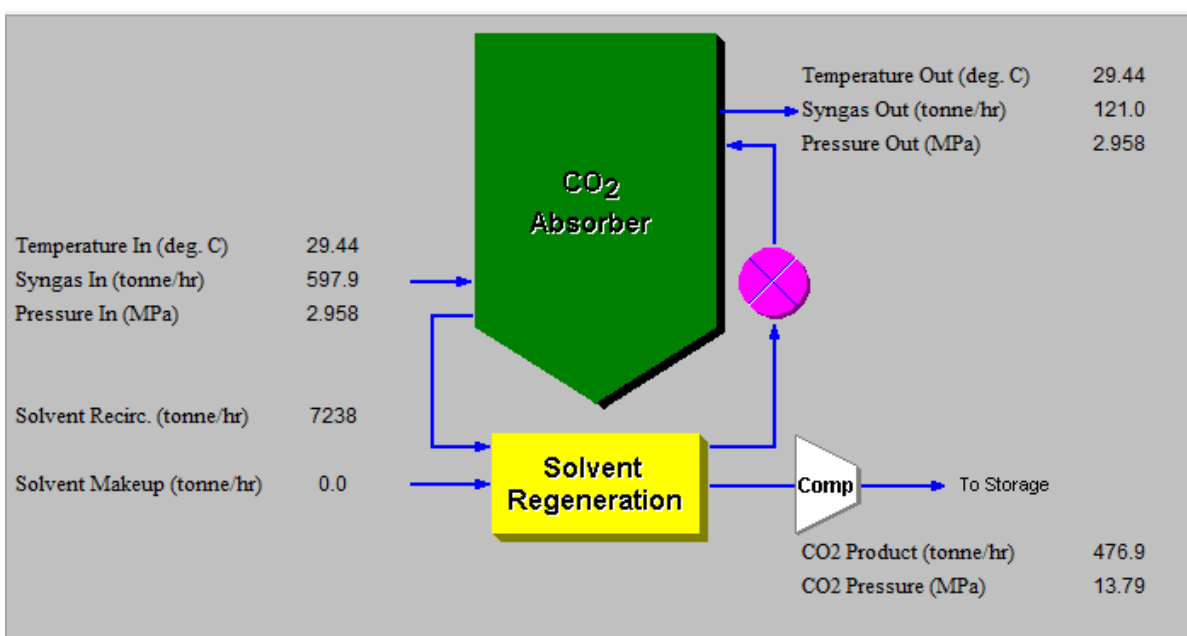

Figure S13. Example process flow diagram of the Selexol CO<sub>2</sub> capture process from IECM [4].

The BILT model and OR SAGE were used to determine the following key inputs for the IECM model: powerplant location, number of turbines, feedstock flowrates, and feedstock prices. The chemical composition and energy density of the fuel mixture was calculated by taking the weighted average of the composition and higher heating value data from the Phillys biomass database. In addition to the input fuel information, the IECM model also required detailed syngas composition leaving the gas separation unit [derived from 27,28-34]. This information can be found in Table S10, while Table S8 lists the values of parameters used to simulate IGCC powerplants in IECM.

**Table S8.** List of parameters used to simulate PC powerplants in IECM.

| Variables                                              | Value      | Unit      |
|--------------------------------------------------------|------------|-----------|
| Capacity factor                                        | 90%        |           |
| Ambient air temperature                                | 18.89      | C         |
| ambient air pressure                                   | 0.10       | MPa       |
| relative humidity                                      | 50%        |           |
| water life cycle assesment enabled?                    | yes        |           |
| SO2 emission constraint                                | 0.03       | mg/kJ     |
| NO2 emission constraint                                | 0.22       | mg/kJ     |
| Particulate emission constraint                        | 0.01       | mh/kJ     |
| Total mercury removal efficiency                       | 70.00      |           |
| Total CO <sub>2</sub> removal efficienct               | 90.00      |           |
| tax on SO <sub>2</sub>                                 | 0.00       | \$/tonne  |
| tax on NO <sub>2</sub>                                 | 0.00       | \$/tonne  |
| tax on CO <sub>2</sub>                                 | 0.00       | \$/tonne  |
| Year costs reported                                    | 2017.00    |           |
| constant or current dollars                            | constant   |           |
| discount rate (before taxes)                           | 0.07       |           |
| fixed charge factor                                    | 0.11       |           |
| plant or project book life                             | 30.00      | years     |
| real bond interest rate                                | 5.83%      |           |
| real preferred stock return                            | 5.34%      |           |
| real common stock return                               | 8.74%      |           |
| percent debt                                           | 45.00%     |           |
| percent equity (preferred stock)                       | 10.00%     |           |
| oercebt equity (real stock)                            | 45.00%     |           |
| federal tax rate                                       | 34.00%     |           |
| state tax rate                                         | 4.15%      |           |
| property tax rate                                      | 2.00%      |           |
| investment tax credit                                  | 0.00%      |           |
| as-delivered coal cost                                 | 0.00       | \$/tonne  |
| natural gas cost                                       | 260.20     | \$/mscm   |
| real escalation rate                                   | 0.00       | %/yr      |
| internal cost of electricity for component allocations | base plant |           |
| internal electricity price                             | 37.65      | \$/MWh    |
| land cost use                                          | 3000.00    | \$/acre   |
| total land requirement                                 | 0.52       | acres/MWg |
| construction time                                      | 3.00       | years     |
| financing cost (%TCP)                                  | 0.00       |           |
| other owners costs (%TCP)                              | 0.00       |           |
| activated carbon                                       | 2417.00    | \$/tonne  |
| alum                                                   | 407.70     | \$/tonne  |



**Table S8.** List of parameters used to simulate PC powerplants in IECM (continued).

| Variables                                | Value         | Unit         |
|------------------------------------------|---------------|--------------|
| ammonia                                  | 149.90        | \$/tonne     |
| caustic                                  | 499.20        | \$/tonne     |
| dibasic acid                             | 639.30        | \$/tonne     |
| flocculant polymer                       | 4786.00       | \$/tonne     |
| lime                                     | 110.30        | \$/tonne     |
| limestone                                | 25.39         | \$/tonne     |
| MEA                                      | 2589.00       | \$/tonne     |
| SCR catalyst                             | 6003.00       | \$/cu m      |
| Urea                                     | 559.40        | \$/tonne     |
| Water                                    | 0.30          | \$/klitter   |
| Hydrated lime                            | 168.10        | \$/tonne     |
| Taxes & insurance                        | 0.00          |              |
| Operating labor rate                     | 34.65         | \$/hr        |
| Real escalation rate                     | 0.00          | %/yr         |
| Gross Electrical Output                  |               | MWg          |
| Unit type                                | Supercritical |              |
| steam cycle heat rate (HHV)              | 1.09E+04      | kJ/kWh       |
| boiler firing type                       | tangential    |              |
| boiler efficiency                        | 94%           |              |
| excess air for furnace                   | 20            | % stoich     |
| leakage air at preheater                 | 10            | % stoich     |
| gas temperature exiting economizer       | 371.1         | deg C        |
| gas temperature exiting air preheater    | 148.9         | deg C        |
| percent water in bottom ash sluice       | 0             |              |
| hydrated lime for so3 removal            | 1059          | kg/kmol SO3  |
| coal pulverizer                          | 1.387         | %MWg         |
| steam cycle pumps                        | 0.16          | %MWg         |
| forced/induced draft fans                | 3.891         | %MWg         |
| miscellaneous                            | 1.04          | %MWg         |
| steam energy added in Boiler             | 2680          | kJ/kg        |
| Boiler Blowdown                          | 6%            |              |
| Miscellaneous Steam Losses               | 0%            |              |
| Demineralizer Underflow                  | 9%            |              |
| Cooling Water Temperature Rise           | 11.11         | deg C        |
| Auxiliary heat exchanger load            | 1%            |              |
| Percent ash entering flue gas stream     | 65%           |              |
| sulfur retained in flyash                | 25%           |              |
| percent of SOx as SO3                    | 0.00056       |              |
| Preheater SO3 removal efficiency         | 10%           |              |
| Nitrogen Oxide emission rate             | 0.3049        | mg/kJ        |
| percent of NOx as NO                     | 95%           |              |
| Concentration of Carbon in collected ash | 0%            |              |
| percent of burned carbon as CO           | 0%            |              |
| Construction time                        | 3.00          | years        |
| %PFC Allocated to Equipment              | 64%           | %PFC         |
| %PFC Allocated to Materials              | 2%            | %PFC         |
| General Facilities Capital               | 10%           | %PFC         |
| Engineering & Home Office Fees (E)       | 7%            | %PFC         |
| Process Contingency Cost (C)             | 2%            | %PFC         |
| Project Contingency Cost                 | 10%           | (%(PFC+E+C)) |

**Table S8.** List of parameters used to simulate PC powerplants in IECM (continued).

| Variables                                                          | Value    | Unit                                        |
|--------------------------------------------------------------------|----------|---------------------------------------------|
| Royalty Fees                                                       | 0%       | %PFC                                        |
| Fixed Operating Cost                                               | 1        | months                                      |
| Variable Operating Cost                                            | 1        | months                                      |
| Miscellaneous Capital Cost                                         | 2%       | %TPI                                        |
| Inventory Capital                                                  | 0%       | %TPC                                        |
| Financing Cost                                                     | 0%       | %TPC                                        |
| Other Owner's Costs                                                | 0%       | %TPC                                        |
| % TCR Amortized                                                    | 0%       |                                             |
| As-Delivered Coal Cost                                             | 0        | (\$/tonne)                                  |
| Waste Disposal Cost                                                | 11.7     | (\$/tonne)                                  |
| Water Cost                                                         | 0.2983   | (\$/kliter)                                 |
| Hydrated Lime Cost                                                 | 168.1    | (\$/tonne)                                  |
| Electricity Price (Internal)                                       | 37.65    | (\$/MWh)                                    |
| Number of Operating Jobs                                           | 20       |                                             |
| Number of Operating Shifts                                         | 4.75     | (shifts/day)                                |
| Operating Labor Rate                                               | 34.65    | (\$/hr)                                     |
| Total Maintenance Cost                                             | 1.975    | (%TPC)                                      |
| Maintenance Cost Allocated to Labor                                | 35       | (%TMC)                                      |
| Administrative & Support Cost                                      | 7        | %total labor                                |
| Taxes & Insurance                                                  | 0        | %TPC                                        |
| Actual NOx Removal Efficiency (%)                                  | 44.39%   |                                             |
| Maximum NOx Removal Efficiency (%)                                 | 50%      |                                             |
| Combustion Modifications                                           | 8.913    | (\$/kw-gross)                               |
| Combustion Modifications                                           | 8.913    | (\$/kw-gross)                               |
| % TCR Amortized (%)                                                | 0%       |                                             |
| Electricity Price (Internal)                                       | 37.65    | (\$/MWh)                                    |
| Combustion Modifications                                           | 1.50%    | %TPC                                        |
| Actual NOx Removal Efficiency                                      | 50%      |                                             |
| Maximum NOx Removal Efficiency                                     | 90%      |                                             |
| Particulate Removal Efficiency                                     | 0%       |                                             |
| Number of SCR Trains                                               | 2        |                                             |
| Number of Spare SCR Trains                                         | 0        |                                             |
| Number of Dummy Catalyst Layers                                    | 1        |                                             |
| Number of Initial Catalyst Layers                                  | 3        |                                             |
| Number of Reserve Catalyst Layers                                  | 0        |                                             |
| Catalyst Replacement Interval                                      | 1.00E+04 | (hours)                                     |
| Catalyst Space Velocity (1/hr)                                     | 4651     | 1/hr                                        |
| Ammonia Stoichiometry                                              | 0.5089   |                                             |
| Steam to Ammonia Ratio (mol H <sub>2</sub> O/mol NH <sub>3</sub> ) | 19       | (mol H <sub>2</sub> O/mol NH <sub>3</sub> ) |
| Steam for Soot Ratio                                               | 6.78E-02 | (lb-moles steam/cu m catalyst)              |
| Total Pressure Drop Across SCR (cm H <sub>2</sub> O gauge)         | 22.86    |                                             |
| Oxidation of SO <sub>2</sub> to SO <sub>3</sub>                    | 0.63%    | (vol%)                                      |
| Hot-Side SCR Power Requirement (% MWg)                             | 0.86%    |                                             |
| Space Velocity (1/hr)                                              | 2500     |                                             |
| Catalyst Replacement Interval (hours)                              | 5694     |                                             |
| Ammonia Slip (ppmv)                                                | 2        |                                             |
| Temperature                                                        | 644.4    | (deg_K)                                     |
| NOx Removal Efficiency (%)                                         | 80%      |                                             |
| NOx Concentration (ppmw)                                           | 500      |                                             |

**Table S8.** List of parameters used to simulate PC powerplants in IECM (continued).

| Variables                                           | Value    | Unit |
|-----------------------------------------------------|----------|------|
| Minimum Activity (fraction)                         | 0.5      |      |
| Reference Time (hours)                              | 1.00E+04 |      |
| Activity at Reference Time (fraction)               | 0.85     |      |
| Ammonia Deposition on Preheater (%)                 | 5%       |      |
| Ammonia Deposition on Fly Ash (%)                   | 50%      |      |
| Ammonia in High Concentration Wash Water (mg/liter) | 310      |      |
| Ammonia in Low Concentration Wash Water (mg/liter)  | 40       |      |
| Ammonia Removed from Wash Water (%)                 | 67%      |      |
| Construction Time (years)                           | 3        |      |
| %PFC Allocated to Equipment (%PFC)                  | 79.73%   |      |
| %PFC Allocated to Materials (%PFC)                  | 0%       |      |
| General Facilities Capital (%PFC)                   | 10%      |      |
| Engineering & Home Office Fees (E) (%PFC)           | 10%      |      |
| Process Contingency Cost (C) (%PFC)                 | 7.12%    |      |
| Project Contingency Cost ( %(PFC+E+C) )             | 15%      |      |
| Royalty Fees (%PFC)                                 | 0%       |      |
| Months of Fixed O&M (months)                        | 1        |      |
| Months of Variable O&M (months)                     | 1        |      |
| Miscellaneous Capital Cost (%TPI)                   | 2%       |      |
| Inventory Capital (%TPC)                            | 0.50%    |      |
| Financing Cost (%TPC)                               | 0%       |      |
| Other Owner's Costs (%TPC)                          | 0%       |      |
| % TCR Amortized (%)                                 | 0%       |      |
| Catalyst Cost (\$/cu m)                             | 6003     |      |
| Ammonia Cost (\$/tonne)                             | 149.9    |      |
| Electricity Price (Internal) (\$/MWh)               | 37.65    |      |
| Number of Operating Jobs (jobs/shift)               | 0.46     |      |
| Number of Operating Shifts (shifts/day)             | 4.75     |      |
| Operating Labor Rate (\$/hr)                        | 34.65%   |      |
| Total Maintenance Cost (%TPC)                       | 2%       |      |
| Maintenance Cost Allocated to Labor (% total)       | 40%      |      |
| Administrative & Support Cost (% total labor)       | 30%      |      |
| Taxes & Insurance (%TPC)                            | 0%       |      |
| Particulate Removal Efficiency (%)                  | 99.46    |      |
| Actual SO <sub>3</sub> Removal Efficiency (%)       | 25       |      |
| Collector Plate Spacing (centimeters)               | 30.48    |      |
| Specific Collection Area (sq m/Macmm)               | 861.9    |      |
| Plate Area per T-R Set (sq m/T-R set)               | 2206     |      |
| Percent Water in ESP Discharge (%)                  | 0        |      |
| Cold-Side ESP Power Requirement (% MWg)             | 0.2149   |      |
| Construction Time (years)                           | 3        |      |
| %PFC Allocated to Equipment (%PFC)                  | 60.16    |      |
| %PFC Allocated to Materials (%PFC)                  | 0        |      |
| General Facilities Capital (%PFC)                   | 1        |      |
| Engineering & Home Office Fees (E) (%PFC)           | 5        |      |
| Process Contingency Cost (C) (%PFC)                 | 0        |      |
| Project Contingency Cost ( %(PFC+E+C) )             | 15       |      |
| Royalty Fees (%PFC)                                 | 0        |      |
| Months of Fixed O&M (months)                        | 1        |      |
| Months of Variable O&M (months)                     | 1        |      |

**Table S8.** List of parameters used to simulate PC powerplants in IECM (continued).

| Variables                                                          | Value     | Unit |
|--------------------------------------------------------------------|-----------|------|
| Miscellaneous Capital Cost (%TPI)                                  | 2         |      |
| Inventory Capital (%TPC)                                           | 0.5       |      |
| Financing Cost (%TPC)                                              | 0         |      |
| Other Owner's Costs (%TPC)                                         | 0         |      |
| % TCR Amortized (%)                                                | 0         |      |
| Water Cost (\$/kliter)                                             | 0.2983    |      |
| Waste Disposal Cost (\$/tonne)                                     | 18.79     |      |
| Electricity Price (Internal) (\$/MWh)                              | 37.65     |      |
| Number of Operating Jobs (jobs/shift)                              | 0.97      |      |
| Number of Operating Shifts (shifts/day)                            | 4.75      |      |
| Operating Labor Rate (\$/hr)                                       | 34.65     |      |
| Total Maintenance Cost (%TPC)                                      | 1.54      |      |
| Maintenance Cost Allocated to Labor (% total)                      | 47.63     |      |
| Administrative & Support Cost (% total labor)                      | 30        |      |
| Taxes & Insurance (%TPC)                                           | 0         |      |
| System Used                                                        | MEA       |      |
| Auxiliary Gas Boiler?                                              | None      |      |
| CO <sub>2</sub> Product Compressor Used?                           | Yes       |      |
| Compressor Type                                                    | 6-stage   |      |
| Flue Gas Bypass Control                                            | No Bypass |      |
| Direct Contact Cooler (DCC) Used?                                  | Yes       |      |
| SO <sub>2</sub> Polisher Used?                                     | Yes       |      |
| SO <sub>2</sub> Polisher Outlet Concentration (ppmv)               | 10        |      |
| Temperature Exiting DCC (deg. C)                                   | 45        |      |
| Maximum CO <sub>2</sub> Removal Efficiency (%)                     | 90        |      |
| Absorber CO <sub>2</sub> Removal Efficiency (%)                    | 90        |      |
| SO <sub>2</sub> Removal Efficiency (%)                             | 99.5      |      |
| SO <sub>3</sub> Removal Efficiency (%)                             | 99.5      |      |
| NO <sub>2</sub> Removal Efficiency (%)                             | 0         |      |
| HCl Removal Efficiency (%)                                         | 95        |      |
| Particulate Removal Efficiency (%)                                 | 50        |      |
| Maximum Train CO <sub>2</sub> Capacity (tonne/hr)                  | 208.7     |      |
| Number of Operating Absorbers (integer)                            | 3         |      |
| Number of Spare Absorbers                                          | 0         |      |
| Maximum CO <sub>2</sub> Compressor Capacity (tonne/hr)             | 299.4     |      |
| Number of Operating CO <sub>2</sub> Compressors (integer)          | 3         |      |
| Number of Spare CO <sub>2</sub> Compressors                        | 0         |      |
| Amine Scrubber Power Requirement (% MWg)                           | 19.16     |      |
| Sorbent Concentration (wt %)                                       | 30        |      |
| Lean CO <sub>2</sub> Loading (mol CO <sub>2</sub> /mol sorb)       | 0.2       |      |
| Sorbent Losses (excluding acid gasses) (kg/tonne CO <sub>2</sub> ) | 2.25      |      |
| Sorbent Recovered (kg/tonne CO <sub>2</sub> )                      | 0.1985    |      |
| Liquid-to-Gas Ratio (ratio)                                        | 3.741     |      |
| Ammonia Generation (mol NH <sub>3</sub> /mol sorb)                 | 1         |      |
| Gas Phase Pressure Drop (MPa)                                      | 1.38E-02  |      |
| ID Fan Efficiency (%)                                              | 75        |      |
| Makeup Water for Wash Section (% raw flue gas)                     | 0.8       |      |
| Activated Carbon Used (kg/tonne CO <sub>2</sub> )                  | 7.50E-02  |      |
| Regenerator Heat Requirement (kJ/kg CO <sub>2</sub> )              | 4722      |      |
| Regenerator Steam Heat Content (kJ/kg steam)                       | 3194      |      |

**Table S8.** List of parameters used to simulate PC powerplants in IECM (continued).

| Variables                                                            | Value      | Unit |
|----------------------------------------------------------------------|------------|------|
| Heat-to-Electricity Efficiency (%)                                   | 18.7       |      |
| Solvent Pumping Head (MPa)                                           | 0.2068     |      |
| Pump Efficiency (%)                                                  | 75         |      |
| Percent Solids in Reclaimer Waste (%)                                | 40         |      |
| Capture System Cooling Duty (t H <sub>2</sub> O/t CO <sub>2</sub> )  | 104.3      |      |
| CO <sub>2</sub> Product Pressure (MPa)                               | 13.79      |      |
| CO <sub>2</sub> Product Purity (vol %)                               | 99.5       |      |
| CO <sub>2</sub> Compressor Efficiency (%)                            | 80         |      |
| CO <sub>2</sub> Unit Compression Energy (kWh/tonne CO <sub>2</sub> ) | 117.9      |      |
| CO <sub>2</sub> Transport Method                                     | Pipeline   |      |
| CO <sub>2</sub> Storage Method                                       | Geologic   |      |
| Construction Time (years)                                            | 3          |      |
| %PFC Allocated to Equipment (%PFC)                                   | 76.64      |      |
| %PFC Allocated to Materials (%PFC)                                   | 0          |      |
| General Facilities Capital (%PFC)                                    | 10         |      |
| Engineering & Home Office Fees (E) (%PFC)                            | 7          |      |
| Process Contingency Cost (C) (%PFC)                                  | 10         |      |
| Project Contingency Cost ( %(PFC+E+C) )                              | 20         |      |
| Royalty Fees (%PFC)                                                  | 0.5        |      |
| Months of Fixed O&M (Preproduction) (months)                         | 1          |      |
| Months of Variable O&M (Preproduction) (months)                      | 1          |      |
| Miscellaneous Capital Cost (Preproduction) (%TPI)                    | 2          |      |
| Inventory Capital (%TPC)                                             | 0.5        |      |
| Financing Cost (%TPC)                                                | 0          |      |
| Other Owner's Costs (%TPC)                                           | 0          |      |
| % TCR Amortized (%)                                                  | 0          |      |
| Sorbent Cost (\$/tonne)                                              | 2589       |      |
| Inhibitor Cost (% of MEA)                                            | 20         |      |
| Activated Carbon Cost (\$/tonne)                                     | 2417       |      |
| Caustic (NaOH) Cost (\$/tonne)                                       | 499.2      |      |
| Water Cost (\$/kliter)                                               | 0.2983     |      |
| Reclaimer Waste Disposal Cost (\$/tonne)                             | 255.8      |      |
| Electricity Price (Internal) (\$/MWh)                                | 37.65      |      |
| CO <sub>2</sub> Transport Cost (Levelized) (\$/tonne)                | 1.439      |      |
| CO <sub>2</sub> Storage Cost (\$/tonne)                              | 2.406      |      |
| Number of Operating Jobs (jobs/shift)                                | 2          |      |
| Number of Operating Shifts (shifts/day)                              | 4.75       |      |
| Operating Labor Rate (\$/hr)                                         | 34.65      |      |
| Total Maintenance Cost (%TPC)                                        | 2.5        |      |
| Maintenance Cost Allocated to Labor (% total)                        | 40         |      |
| Administrative & Support Cost (% total labor)                        | 30         |      |
| Taxes & Insurance (%TPC)                                             | 0          |      |
| Pipeline Region                                                      | Midwest US |      |
| Total Pipeline Length (km)                                           | 100        |      |
| Net Pipeline Elevation Change (Plant->Inj.) (meters)                 | 0          |      |
| Number of Booster Stations (integer)                                 | 0          |      |
| Compressor/Pump Driver                                               | Electric   |      |
| Booster Pump Efficiency (%)                                          | 75         |      |
| Design Pipeline Flow (% plant cap)                                   | 100        |      |
| Design Pipeline Flow (tonne/yr)                                      | 5.44E+06   |      |



**Table S8.** List of parameters used to simulate PC powerplants in IECM (continued).

| Variables                                                       | Value       | Unit |
|-----------------------------------------------------------------|-------------|------|
| Actual Pipeline Flow (tonne/yr)                                 | 4.90E+06    |      |
| Inlet Pressure (@ power plant) (MPa)                            | 13.79       |      |
| Min Outlet Pressure (@ storage site) (MPa)                      | 10.3        |      |
| Average Ground Temperature (deg. C)                             | 5.6         |      |
| Pipe Material Roughness (centimeters)                           | 4.57E-03    |      |
| Construction Time (years)                                       | 3           |      |
| %PFC Allocated to Equipment (%PFC)                              | 76.64       |      |
| %PFC Allocated to Materials (%PFC)                              | 0           |      |
| General Facilities Capital (%PFC)                               | 0           |      |
| Engineering & Home Office Fees (E) (%PFC)                       | 0           |      |
| Process Contingency Cost (C) (%PFC)                             | 0           |      |
| Project Contingency Cost ( %(PFC+E+C) )                         | 0           |      |
| Royalty Fees (%PFC)                                             | 0           |      |
| Months of Fixed O&M (months)                                    | 0           |      |
| Months of Variable O&M (months)                                 | 0           |      |
| Miscellaneous Capital Cost (%TPI)                               | 0           |      |
| Inventory Capital (%TPC)                                        | 0           |      |
| % TCR Amortized (%)                                             | 0           |      |
| Booster Pump Operating Cost (%PFC)                              | 1.5         |      |
| Fixed O&M Cost (\$/km-yr)                                       | 3100        |      |
| Reservoir Depth (meters)                                        | 1219        |      |
| Reservoir Thickness (meters)                                    | 304.8       |      |
| Reservoir Horizontal Permeability (mD)                          | 100         |      |
| Reservoir Porosity (%)                                          | 12          |      |
| Storage Coefficient (%)                                         | 5.8         |      |
| Reservoir Surface Temperature (deg. C)                          | 45.44       |      |
| Geographical Area for CO <sub>2</sub> Storage (sq km)           | 7.02E+04    |      |
| Performance Model                                               | Law & Bachu |      |
| Project Average Injection Rate (Mt CO <sub>2</sub> /yr)         | 4.896       |      |
| Design Maximum Injection Rate per Well (Mt CO <sub>2</sub> /yr) | 6.12        |      |
| Monitoring Well Density                                         |             |      |
| Wells in Reservoir (sq km/well)                                 | 10.36       |      |
| Wells Above Seal (sq km/well)                                   | 5.18        |      |
| Wells that are Dual Completed (sq km/well)                      | 10.36       |      |
| Wells Groundwater (Wells/Inj. Well)                             | 3           |      |
| Wells Vadose Zone (Wells/Inj. Well)                             | 3           |      |
| Dual Completed Wells in Reservoir (%)                           | 100         |      |
| AOR Margin 3D (% of Plume)                                      | 30          |      |
| Regional Evaluation Duration (years)                            | 1           |      |
| Site Characterization Duration (years)                          | 1           |      |
| Permitting Duration (years)                                     | 1           |      |
| General Facilities Factor (%)                                   | 10          |      |
| Administrative Factor (E) (%)                                   | 10          |      |
| Process Contingency Factor (C) (%PFC)                           | 20          |      |
| Project Contingency Factor ( %(PFC+E+C) )                       | 20          |      |
| Miscellaneous Capital Cost (%TPI)                               | 0           |      |
| % TCR Amortized (%)                                             | 0           |      |
| Operation Duration (years)                                      | 30          |      |
| Contingency Factor (%)                                          | 20          |      |
| Geophysical Survey: 3D Seismic (\$/sq km)                       | 6.18E+04    |      |

**Table S8.** List of parameters used to simulate PC powerplants in IECM (continued).

| Variables                                      | Value       | Unit |
|------------------------------------------------|-------------|------|
| Labor Rates                                    |             |      |
| Geologist (\$/hr)                              | 107.2       |      |
| Engineer (\$/hr)                               | 110.6       |      |
| Landman (\$/hr)                                | 75          |      |
| Miscellaneous Operations (%)                   | 1           |      |
| PISC and Site Closure Duration (years)         | 50          |      |
| Well Seismic: VSP Tool Costs (\$/well)         | 3.00E+05    |      |
| Miscellaneous PISC and Site Closure (%)        | 0.5         |      |
| Furnace Removal (total) (%)                    | 7           |      |
| Cold-Side ESP (total w/o control) (%)          | 0           |      |
| Cold-Side ESP (oxidized) (%)                   | 55.84       |      |
| Cold-Side ESP (elemental) (%)                  | 55.84       |      |
| Wet FGD (oxidized) (%)                         | 95          |      |
| Wet FGD (elemental) (%)                        | 0           |      |
| Wet FGD (particulate) (%)                      | 0           |      |
| Percent Increase in Speciation                 |             |      |
| In-furnace NO <sub>x</sub> (oxidized) (%)      | 0           |      |
| SNCR (oxidized) (%)                            | 0           |      |
| Hot-Side SCR (oxidized) (%)                    | 35          |      |
| Carbon Injection Rate (*) (kg C/Macmm)         | 38.89       |      |
| Carbon Injection Power Reqmt (% MWg)           | 2.22E-02    |      |
| Construction Time (years)                      | 3           |      |
| %PFC Allocated to Equipment (%PFC)             | 63.82       |      |
| %PFC Allocated to Materials (%PFC)             | 2.46        |      |
| General Facilities Capital (%PFC)              | 5           |      |
| Engineering & Home Office Fees (E) (%PFC)      | 10          |      |
| Process Contingency Cost (C) (%PFC)            | 5           |      |
| Project Contingency Cost (%(PFC+E+C))          | 15          |      |
| Royalty Fees (%PFC)                            | 0           |      |
| Fixed Operating Cost (months)                  | 1           |      |
| Variable Operating Cost (months)               | 1           |      |
| Miscellaneous Capital Cost (%TPI)              | 2           |      |
| Inventory Capital (%TPC)                       | 0.5         |      |
| Financing Cost (%TPC)                          | 0           |      |
| Other Owner's Costs (%TPC)                     | 0           |      |
| % TCR Amortized (%)                            | 0           |      |
| Activated Carbon Cost (w. shipping) (\$/tonne) | 2417        |      |
| Disposal Cost (\$/tonne)                       | 18.79       |      |
| Electricity Price (Internal) (\$/MWh)          | 37.31       |      |
| Number of Operating Jobs (jobs/shift)          | 0.175       |      |
| Number of Operating Shifts (shifts/day)        | 4.75        |      |
| Operating Labor Rate (\$/hr)                   | 34.65       |      |
| Total Maintenance Cost (%TPC)                  | 1.48E-02    |      |
| Maintenance Cost Allocated to Labor (% total)  | 40          |      |
| Administrative & Support Cost (% total labor)  | 25          |      |
| Taxes & Insurance (%TPC)                       | 0           |      |
| Reagent                                        | Limestone   |      |
| Flue Gas Bypass Control                        | No Bypass   |      |
| Demister for Outlet Flue Gas                   | No Demister |      |
| Maximum SO <sub>2</sub> Removal Efficiency (%) | 98          |      |

**Table S8.** List of parameters used to simulate PC powerplants in IECM (continued).

| Variables                                                  | Value    | Unit |
|------------------------------------------------------------|----------|------|
| Scrubber SO <sub>2</sub> Removal Efficiency (%)            | 98       |      |
| Scrubber SO <sub>3</sub> Removal Efficiency (%)            | 50       |      |
| Particulate Removal Efficiency (%)                         | 50       |      |
| Absorber Capacity (% acmm)                                 | 100      |      |
| Number of Operating Absorbers (integer)                    | 1        |      |
| Number of Spare Absorbers                                  | 0        |      |
| Liquid-to-Gas Ratio (lpm/kacmm)                            | 4.41E+04 |      |
| Reagent Stoichiometry (mol Ca/mol S rem)                   | 1.03     |      |
| Reagent Purity (wt %)                                      | 92.4     |      |
| Reagent Moisture Content (wt %)                            | 0        |      |
| Total Pressure Drop Across FGD (cm H <sub>2</sub> O gauge) | 25.4     |      |
| Temperature Rise Across ID Fan (deg. C)                    | 7.778    |      |
| Gas Temperature Exiting Scrubber (deg. C)                  | 62.33    |      |
| Gas Temperature Exiting Reheater (deg. C)                  | 62.33    |      |
| Entrained Water Past Demister (% evap H <sub>2</sub> O)    | 0.79     |      |
| Wet FGD Power Requirement (% MWg)                          | 6.973    |      |
| Oxidation of CaSO <sub>3</sub> to CaSO <sub>4</sub> (%)    | 90       |      |
| Excess Air for Oxidation (% stoic)                         | 0        |      |
| Excess Water for Oxidation (% stoic)                       | 0        |      |
| Chloride Removal Efficiency (%)                            | 90       |      |
| Construction Time (years)                                  | 3        |      |
| %PFC Allocated to Equipment (%PFC)                         | 79.73    |      |
| %PFC Allocated to Materials (%PFC)                         | 0        |      |
| General Facilities Capital (%PFC)                          | 10       |      |
| Engineering & Home Office Fees (E) (%PFC)                  | 10       |      |
| Process Contingency Cost (C) (%PFC)                        | 2        |      |
| Project Contingency Cost ( %(PFC+E+C) )                    | 15       |      |
| Royalty Fees (%PFC)                                        | 0.5      |      |
| Months of Fixed O&M (Preproduction) (months)               | 1        |      |
| Months of Variable O&M (Preproduction) (months)            | 1        |      |
| Miscellaneous Capital Cost (Preproduction) (%TPI)          | 2        |      |
| Inventory Capital (%TPC)                                   | 6.46E-02 |      |
| Financing Cost (%TPC)                                      | 0        |      |
| Other Owner's Costs (%TPC)                                 | 0        |      |
| % TCR Amortized (%)                                        | 0        |      |
| Bulk Reagent Storage Time (days)                           | 60       |      |
| Limestone Cost (\$/tonne)                                  | 25.39    |      |
| Lime Cost (\$/tonne)                                       | 110.3    |      |
| Waste Disposal Cost (\$/tonne)                             | 14.47    |      |
| Electricity Price (Internal) (\$/MWh)                      | 37.31    |      |
| Number of Operating Jobs (jobs/shift)                      | 6.67     |      |
| Number of Operating Shifts (shifts/day)                    | 4.75     |      |
| Operating Labor Rate (\$/hr)                               | 34.65    |      |
| Total Maintenance Cost (%TPC)                              | 4.467    |      |
| Maintenance Cost Allocated to Labor (% total)              | 40       |      |
| Administrative & Support Cost (% total labor)              | 30       |      |
| Taxes & Insurance (%TPC)                                   | 0        |      |

**Table S9.** Complete list of parameters used to model IGCC powerplants on IECM.

| Title                                                   | Value      |
|---------------------------------------------------------|------------|
| Number of Gas Turbines                                  | 2          |
| Gross Electrical Output (MWg)                           | 630        |
| Capacity Factor (%)                                     | 90         |
| Process Water Demand Factor (l/MWh-net)                 | 583        |
| Ambient Air Temperature (Dry Bulb Average) (deg. C)     | 18.89      |
| Ambient Air Pressure (MPa)                              | 0.1014     |
| Relative Humidity (Average) (%)                         | 50         |
| Ambient Air Humidity (kg H <sub>2</sub> O/kg dry air)   | 6.77E-03   |
| Capital Cost Multipliers (ratio of Local/Default value) |            |
| Construction Equipment Cost                             | 1          |
| Construction Materials Cost                             | 1          |
| Construction Labor Cost                                 | 1          |
| Construction Labor Productivity                         | 1          |
| Seismicity Factor                                       | 1          |
| Sulfur Dioxide (SO <sub>2</sub> ) (\$/tonne)            | 0          |
| Nitrogen Oxide (Equivalent NO <sub>2</sub> ) (\$/tonne) | 0          |
| Carbon Dioxide (CO <sub>2</sub> ) (\$/tonne)            | 0          |
| Year Costs Reported                                     | 2017       |
| Constant or Current Dollars?                            | Constant   |
| Discount Rate (Before Taxes) (fraction)                 | 7.09E-02   |
| Fixed Charge Factor (FCF) (fraction)                    | 0.1128     |
| Plant or Project Book Life (years)                      | 30         |
| Real Bond Interest Rate (%)                             | 5.83       |
| Real Preferred Stock Return (%)                         | 5.34       |
| Real Common Stock Return (%)                            | 8.74       |
| Percent Debt (%)                                        | 45         |
| Percent Equity (Preferred Stock) (%)                    | 10         |
| Percent Equity (Common Stock) (%)                       | 45         |
| Federal Tax Rate (%)                                    | 34         |
| State Tax Rate (%)                                      | 4.15       |
| Property Tax Rate (%)                                   | 2          |
| Investment Tax Credit (%)                               | 0          |
| As-Delivered Coal Cost (\$/tonne)                       | 0          |
| Auxiliary Gas Cost (\$/mscm)                            | 260.2      |
| Real Escalation Rate (fuel) (%/yr)                      | 0          |
| Internal Cost of Electricity for Component Allocations  | Base Plant |
| Internal Electricity Price (\$/MWh)                     | 10.76      |
| Land Use Cost (\$/acre)                                 | 3000       |
| Total Land Requirement (acres/MWg)                      | 0.517      |
| Construction Time (years)                               | 4          |
| Financing Cost (%TPC)                                   | 0          |
| Other Owner's Costs (%TPC)                              | 0          |
| Activated Carbon Cost (\$/tonne)                        | 2417       |
| Ammonia Cost (\$/tonne)                                 | 149.9      |
| Beavon-Stretford Catalyst Cost (\$/cu m)                | 7151       |
| Caustic (NaOH) Cost (\$/tonne)                          | 499.2      |
| Claus Plant Catalyst Cost (\$/tonne)                    | 577.8      |
| Glycol Cost (\$/kg)                                     | 6.391      |
| Shift Reactor Catalyst (Hi-T) (\$/cu m)                 | 2612       |

**Table S9.** Complete list of parameters used to model IGCC powerplants on IECM (continued).

| Title                                         | Value    |
|-----------------------------------------------|----------|
| Shift Reactor Catalyst (Low-T) (\$/cu m)      | 1.31E+04 |
| Urea Cost (\$/tonne)                          | 559.4    |
| Ionic Liquid Cost (\$/tonne)                  | 1.10E+04 |
| Water Cost (\$/kliter)                        | 0.2983   |
| Taxes & Insurance (%TPC)                      | 0        |
| Operating Labor Rate (\$/hr)                  | 34.65    |
| Sulfur Byproduct Credit (\$/tonne)            | 70.11    |
| Real Escalation Rate (for all above) (%/yr)   | 0        |
| Oxidant Composition                           |          |
| Oxygen (O2) (vol %)                           | 95       |
| Argon (Ar) (vol %)                            | 4.234    |
| Nitrogen (N2) (vol %)                         | 0.7657   |
| Final Oxidant Pressure (MPa)                  | 3.999    |
| Maximum Train Capacity (tonne/hr)             | 550      |
| Number of Operating Trains (integer)          | 1        |
| Number of Spare Trains                        | 0        |
| Unit Separation ASU Energy (kWh/tonne)        | 6860     |
| Total Cryogenic ASU Energy (% MWg)            | 1.53E-02 |
| Construction Time (years)                     | 4        |
| %PFC Allocated to Equipment (%PFC)            | 76.64    |
| %PFC Allocated to Materials (%PFC)            | 0        |
| General Facilities Capital (%PFC)             | 15       |
| Engineering & Home Office Fees (E) (%PFC)     | 10       |
| Process Contingency Cost (C) (%PFC)           | 5        |
| Project Contingency Cost (%(PFC+E+C))         | 15       |
| Royalty Fees (%PFC)                           | 0.5      |
| Months of Fixed O&M (months)                  | 1        |
| Months of Variable O&M (months)               | 1        |
| Miscellaneous Capital Cost (%TPI)             | 2        |
| Inventory Capital (%TPC)                      | 0.5      |
| Financing Cost (%TPC)                         | 0        |
| Other Owner's Costs (%TPC)                    | 0        |
| % TCR Amortized (%)                           | 0        |
| Electricity Price (Internal) (\$/MWh)         | 10.76    |
| Number of Operating Jobs (jobs/shift)         | 6.67     |
| Number of Operating Shifts (shifts/day)       | 4.75     |
| Operating Labor Rate (\$/hr)                  | 34.65    |
| Total Maintenance Cost (%TPC)                 | 2        |
| Maintenance Cost Allocated to Labor (% total) | 40       |
| Administrative & Support Cost (% total labor) | 30       |
| Taxes & Insurance (%TPC)                      | 0        |
| Capital Cost Process Area                     |          |
| Air Separation Unit (retro \$/new \$)         | 1        |
| Final Oxidant Compression (retro \$/new \$)   | 1        |
| Gasifier Area                                 |          |
| Gasifier Temperature (deg. C)                 | 1343     |
| Gasifier Pressure (MPa)                       | 4.24     |
| Total Water or Steam Input (mol H2O/mol C)    | 1.274    |
| Oxygen Input from ASU (mol O2/mol C)          | 0        |
| Total Carbon in Slag (%)                      | 3        |



**Table S9.** Complete list of parameters used to model IGCC powerplants on IECM (continued).

| Title                                         | Value    |
|-----------------------------------------------|----------|
| Sulfur Loss to Solids (%)                     | 0        |
| Coal Ash in Raw Syngas (%)                    | 0        |
| Percent Water in Slag Sluice (%)              | 0        |
| Number of Operating Trains (integer)          | 1        |
| Number of Spare Trains                        | 1        |
| Particulate Removal Efficiency (%)            | 100      |
| Power Requirement (% MWg)                     | 2.40E-06 |
| Construction Time (years)                     | 4        |
| %PFC Allocated to Equipment (%PFC)            | 63.82    |
| %PFC Allocated to Materials (%PFC)            | 2.46     |
| (Remainder allocated to construction labor.)  |          |
| General Facilities Capital (%PFC)             | 15       |
| Engineering & Home Office Fees (E) (%PFC)     | 10       |
| Process Contingency Cost (C) (%PFC)           | 13.82    |
| Project Contingency Cost (%(PFC+E+C))         | 15       |
| Royalty Fees (%PFC)                           | 0.5      |
| Pre-Production Costs                          |          |
| Months of Fixed O&M (months)                  | 1        |
| Months of Variable O&M (months)               | 1        |
| Miscellaneous Capital Cost (%TPI)             | 2        |
| Inventory Capital (%TPC)                      | 1        |
| Financing Cost (%TPC)                         | 0        |
| Other Owner's Costs (%TPC)                    | 0        |
| % TCR Amortized (%)                           | 0        |
| Slag Disposal Cost (\$/tonne)                 | 17.73    |
| Water Cost (\$/kliter)                        | 0.2983   |
| Electricity Price (Internal) (\$/MWh)         | 10.76    |
| Number of Operating Jobs (jobs/shift)         | 6.67     |
| Number of Operating Shifts (shifts/day)       | 4.75     |
| Operating Labor Rate (\$/hr)                  | 34.65    |
| Total Maintenance Cost (%TPC)                 | 4.225    |
| Maintenance Cost Allocated to Labor (% total) | 40       |
| Administrative & Support Cost (% total labor) | 30       |
| Taxes & Insurance (%TPC)                      | 0        |
| COS to H2S Conversion Efficiency (%)          | 98.5     |
| Sulfur Removal Unit                           |          |
| H2S Removal Efficiency (%)                    | 98       |
| COS Removal Efficiency (%)                    | 33       |
| CO <sub>2</sub> Removal Efficiency (%)        | 0        |
| Max Syngas Capacity per Train (tonne/hr)      | 225.2    |
| Number of Operating Absorbers (integer)       | 2        |
| Power Requirement (% MWg)                     | 5.52E-02 |
| Sulfur Recovery Efficiency (%)                | 95       |
| Max Sulfur Capacity per Train (tonne/hr)      | 4.536    |
| Number of Operating Absorbers (integer)       | 1        |
| Power Requirement (% MWg)                     | 6.89E-02 |
| Tailgas Treatment                             |          |
| Sulfur Recovery Efficiency (%)                | 99       |
| Power Requirement (% MWg)                     | 0.2097   |
| Construction Time (years)                     | 4        |

**Table S9.** Complete list of parameters used to model IGCC powerplants on IECM (continued).

| <b>Title</b>                                            | <b>Value</b> |
|---------------------------------------------------------|--------------|
| %PFC Allocated to Equipment (%PFC)                      | 79.73        |
| %PFC Allocated to Materials (%PFC)                      | 0            |
| (Remainder allocated to construction labor.)            |              |
| General Facilities Capital (%PFC)                       | 15           |
| Engineering & Home Office Fees (E) (%PFC)               | 10           |
| Process Contingency Cost (C) (%PFC)                     | 10           |
| Project Contingency Cost (%(PFC+E+C))                   | 15           |
| Royalty Fees (%PFC)                                     | 0.5          |
| Pre-Production Costs                                    |              |
| Months of Fixed O&M (months)                            | 1            |
| Months of Variable O&M (months)                         | 1            |
| Miscellaneous Capital Cost (%TPI)                       | 2            |
| Inventory Capital (%TPC)                                | 0.5          |
| Financing Cost (%TPC)                                   | 0            |
| Other Owner's Costs (%TPC)                              | 0            |
| % TCR Amortized (%)                                     | 0            |
| Construction Time (years)                               | 4            |
| %PFC Allocated to Equipment (%PFC)                      | 79.73        |
| %PFC Allocated to Materials (%PFC)                      | 0            |
| General Facilities Capital (%PFC)                       | 15           |
| Engineering & Home Office Fees (E) (%PFC)               | 10           |
| Process Contingency Cost (C) (%PFC)                     | 10           |
| Project Contingency Cost (%(PFC+E+C))                   | 15           |
| Royalty Fees (%PFC)                                     | 0.5          |
| Months of Fixed O&M (months)                            | 1            |
| Months of Variable O&M (months)                         | 1            |
| Miscellaneous Capital Cost (%TPI)                       | 2            |
| Inventory Capital (%TPC)                                | 0.5          |
| Financing Cost (%TPC)                                   | 0            |
| Other Owner's Costs (%TPC)                              | 0            |
| % TCR Amortized (%)                                     | 0            |
| Selexol Solvent Cost (\$/kg)                            | 6.391        |
| Claus Plant Catalyst Cost (\$/tonne)                    | 577.8        |
| Beavon-Stretford Catalyst Cost (\$/cu m)                | 7151         |
| Sulfur Byproduct Credit (\$/tonne)                      | 70.11        |
| Sulfur Disposal Cost (\$/tonne)                         | 12.08        |
| Sulfur Sold on Market (%)                               | 90           |
| Number of Operating Jobs (jobs/shift)                   | 6.67         |
| Number of Operating Shifts (shifts/day)                 | 4.75         |
| Total Maintenance Cost (%TPC)                           | 1.961        |
| Maintenance Cost Allocated to Labor (% total)           | 40           |
| Administrative & Support Cost (% total labor)           | 30           |
| Taxes & Insurance (%TPC)                                | 0            |
| COS Conversion System - Hydrolyzer (retro \$/new \$)    | 1            |
| Sulfur Removal System - Selexol (retro \$/new \$)       | 1            |
| Sulfur Recovery System - Claus (retro \$/new \$)        | 1            |
| Tail Gas Treatment - Beavon-Stretford (retro \$/new \$) | 1            |
| Water-Gas Shift Reactor                                 |              |
| CO to CO <sub>2</sub> Conversion Efficiency (%)         | 95           |
| COS to H <sub>2</sub> S Conversion Efficiency (%)       | 98.5         |

**Table S9.** Complete list of parameters used to model IGCC powerplants on IECM (continued).

| Title                                                                | Value    |
|----------------------------------------------------------------------|----------|
| Steam Added (mol H <sub>2</sub> O/mol CO)                            | 0.99     |
| Maximum Train CO <sub>2</sub> Capacity (tonne/hr)                    | 139.6    |
| Number of Operating Absorbers (integer)                              | 1        |
| Number of Spare Absorbers                                            | 0        |
| Thermal Energy Credit (% MWg)                                        | 3.87     |
| Construction Time (years)                                            | 4        |
| %PFC Allocated to Equipment (%PFC)                                   | 76.64    |
| %PFC Allocated to Materials (%PFC)                                   | 0        |
| (Remainder allocated to construction labor.)                         |          |
| General Facilities Capital (%PFC)                                    | 15       |
| Engineering & Home Office Fees (E) (%PFC)                            | 10       |
| Process Contingency Cost (C) (%PFC)                                  | 5        |
| Project Contingency Cost (%(PFC+E+C))                                | 15       |
| Royalty Fees (%PFC)                                                  | 0.5      |
| Pre-Production Costs                                                 |          |
| Months of Fixed O&M (months)                                         | 1        |
| Months of Variable O&M (months)                                      | 1        |
| Miscellaneous Capital Cost (%TPI)                                    | 2        |
| Inventory Capital (%TPC)                                             | 0.5      |
| Financing Cost (%TPC)                                                | 0        |
| Other Owner's Costs (%TPC)                                           | 0        |
| % TCR Amortized (%)                                                  | 0        |
| High Temperature Catalyst Cost (\$/cu m)                             | 2612     |
| Low Temperature Catalyst Cost (\$/cu m)                              | 1.31E+04 |
| Water Cost (\$/kliter)                                               | 0.2983   |
| Electricity Price (Internal) (\$/MWh)                                | 10.76    |
| Number of Operating Jobs (jobs/shift)                                | 1        |
| Number of Operating Shifts (shifts/day)                              | 4.75     |
| Operating Labor Rate (\$/hr)                                         | 34.65    |
| Total Maintenance Cost (%TPC)                                        | 1.969    |
| Maintenance Cost Allocated to Labor (% total)                        | 40       |
| Administrative & Support Cost (% total labor)                        | 30       |
| Taxes & Insurance (%TPC)                                             | 0        |
| High Temperature Reactor (retro \$/new \$)                           | 1        |
| Low Temperature Reactor (retro \$/new \$)                            | 1        |
| Heat Exchangers (retro \$/new \$)                                    | 1        |
| CO <sub>2</sub> Removal Efficiency (%)                               | 90       |
| H <sub>2</sub> S Removal Efficiency (%)                              | 94       |
| Max Syngas Capacity per Train (tonne/hr)                             | 287.3    |
| Number of Operating Absorbers (integer)                              | 1        |
| Number of Spare Absorbers                                            | 0        |
| CO <sub>2</sub> Product Compressor Used?                             | Yes      |
| Power Requirement (% MWg)                                            | 0        |
| CO <sub>2</sub> Product Stream                                       |          |
| CO <sub>2</sub> Product Pressure (MPa)                               | 13.79    |
| CO <sub>2</sub> Compressor Efficiency (%)                            | 80       |
| CO <sub>2</sub> Unit Compression Energy (kWh/tonne CO <sub>2</sub> ) | 0        |
| CO <sub>2</sub> Transport Method                                     | Pipeline |
| CO <sub>2</sub> Storage Method                                       | Geologic |
| Construction Time (years)                                            | 4        |

**Table S9.** Complete list of parameters used to model IGCC powerplants on IECM (continued).

| <b>Title</b>                                  | <b>Value</b> |
|-----------------------------------------------|--------------|
| %PFC Allocated to Equipment (%PFC)            | 76.64        |
| %PFC Allocated to Materials (%PFC)            | 0            |
| (Remainder allocated to construction labor.)  |              |
| General Facilities Capital (%PFC)             | 15           |
| Engineering & Home Office Fees (E) (%PFC)     | 10           |
| Process Contingency Cost (C) (%PFC)           | 10           |
| Project Contingency Cost (%(PFC+E+C))         | 15           |
| Royalty Fees (%PFC)                           | 0.5          |
| Pre-Production Costs                          |              |
| Months of Fixed O&M (months)                  | 1            |
| Months of Variable O&M (months)               | 1            |
| Miscellaneous Capital Cost (%TPI)             | 2            |
| Inventory Capital (%TPC)                      | 0.5          |
| Financing Cost (%TPC)                         | 0            |
| Other Owner's Costs (%TPC)                    | 0            |
| % TCR Amortized (%)                           | 0            |
| Bulk Reagent Storage Time (days)              | 60           |
| Glycol Cost (\$/kg)                           | 6.391        |
| Waste Disposal Cost (\$/tonne)                | 0            |
| Electricity Price (Internal) (\$/MWh)         | 10.76        |
| Number of Operating Jobs (jobs/shift)         | 2            |
| Number of Operating Shifts (shifts/day)       | 4.75         |
| Operating Labor Rate (\$/hr)                  | 34.65        |
| Total Maintenance Cost (%TPC)                 | 4.902        |
| Maintenance Cost Allocated to Labor (% total) | 40           |
| Administrative & Support Cost (% total labor) | 30           |
| Gas Turbine/Generator                         |              |
| Gas Turbine Model                             | GE 7FB       |
| Number of Gas Turbines                        | 2            |
| Total Gas Turbine Output (MW)                 | 0            |
| Fuel Gas Moisture Content (vol %)             | 33           |
| Turbine Inlet Temperature (deg. C)            | 1371         |
| Turbine Back Pressure (MPa)                   | 1.38E-02     |
| Adiabatic Turbine Efficiency (%)              | 85.7         |
| Shaft/Generator Efficiency (%)                | 98           |
| Air Compressor                                |              |
| Pressure Ratio (outlet/inlet) (ratio)         | 18.5         |
| Adiabatic Compressor Efficiency (%)           | 87.5         |
| Combustor                                     |              |
| Combustor Inlet Pressure (MPa)                | 1.875        |
| Combustor Pressure Drop (MPa)                 | 2.76E-02     |
| Excess Air For Combustor (% stoich.)          | 0            |
| HRSG Outlet Temperature (deg. C)              | 121.1        |
| Steam Cycle Heat Rate, HHV (*1) (kJ/kWh)      | 9496         |
| Cooling Water Temperature Rise (deg. C)       | 11.11        |
| Auxiliary Heat Exchanger Load (*2) (%)        | 1.41         |
| Total Steam Turbine Output (MWg)              | 0            |
| Power Requirement (% MWg)                     | 2            |
| Construction Time (years)                     | 4            |
| %PFC Allocated to Equipment (%PFC)            | 63.82        |

**Table S9.** Complete list of parameters used to model IGCC powerplants on IECM (continued).

| Title                                         | Value |
|-----------------------------------------------|-------|
| %PFC Allocated to Materials (%PFC)            | 2.46  |
| (Remainder allocated to construction labor.)  |       |
| General Facilities Capital (%PFC)             | 15    |
| Engineering & Home Office Fees (E) (%PFC)     | 10    |
| Process Contingency Cost (C) (%PFC)           | 9.057 |
| Project Contingency Cost (PFC+E+C)            | 15    |
| Royalty Fees (%PFC)                           | 0.5   |
| Pre-Production Costs                          |       |
| Months of Fixed O&M (months)                  | 1     |
| Months of Variable O&M (months)               | 1     |
| Miscellaneous Capital Cost (%TPI)             | 2     |
| Inventory Capital (%TPC)                      | 0.5   |
| Financing Cost (%TPC)                         | 0     |
| Other Owner's Costs (%TPC)                    | 0     |
| % TCR Amortized (%)                           | 0     |
| Electricity Price (Internal) (\$/MWh)         | 10.76 |
| Number of Operating Jobs (jobs/shift)         | 6.67  |
| Number of Operating Shifts (shifts/day)       | 4.75  |
| Operating Labor Rate (\$/hr)                  | 34.65 |
| Total Maintenance Cost (%TPC)                 | 1.472 |
| Maintenance Cost Allocated to Labor (% total) | 40    |
| Administrative & Support Cost (% total labor) | 30    |
| Taxes & Insurance (%TPC)                      | 0     |

376

**Table S10.** Syngas chemical composition of all feedstocks used.

|                 | Barley<br>Straw | Corn<br>Stover | Hardwood | Miscanthus | Mixedwood | Oats<br>Straw | Pine  |
|-----------------|-----------------|----------------|----------|------------|-----------|---------------|-------|
| 1-C4H8          | 0.00            | 0.03           | 0.00     | 0.00       | 0.00      | 0.00          | 0.00  |
| 2-cis-C4H8      | 0.00            | 0.01           | 0.00     | 0.00       | 0.00      | 0.00          | 0.00  |
| 2-trans-C4H8    | 0.00            | 0.00           | 0.00     | 0.00       | 0.00      | 0.00          | 0.00  |
| C2H2            | 0.00            | 0.19           | 0.00     | 0.00       | 0.00      | 0.00          | 0.00  |
| C2H4            | 0.00            | 1.76           | 0.00     | 0.00       | 0.48      | 0.31          | 0.00  |
| C2H6            | 0.00            | 0.00           | 0.00     | 0.00       | 0.00      | 1.23          | 0.00  |
| C3H6            | 0.00            | 0.05           | 0.00     | 0.00       | 0.00      | 0.42          | 0.00  |
| C3H8            | 0.00            | 0.17           | 0.00     | 0.00       | 0.00      | 0.01          | 0.00  |
| CH4             | 0.31            | 6.43           | 1.30     | 3.90       | 3.59      | 8.53          | 4.79  |
| CO              | 21.77           | 11.44          | 19.70    | 10.77      | 11.66     | 14.24         | 14.83 |
| CO <sub>2</sub> | 0.42            | 9.95           | 11.90    | 9.84       | 7.13      | 8.55          | 14.20 |
| COS             | 0.00            | 0.00           | 0.00     | 0.00       | 0.00      | 0.00          | 0.00  |
| H2              | 18.42           | 11.30          | 9.10     | 17.50      | 19.15     | 8.70          | 8.19  |
| H2O             | 0.93            | 0.00           | 0.00     | 0.00       | 0.00      | 0.00          | 0.00  |
| H2S             | 0.00            | 0.00           | 0.00     | 0.00       | 0.00      | 0.00          | 0.00  |
| HCL             | 0.07            | 0.00           | 0.00     | 0.00       | 0.00      | 0.00          | 0.00  |
| He              | 0.00            | 0.67           | 0.00     | 0.00       | 0.00      | 0.00          | 0.00  |
| LHV             | 0.00            | 0.00           | 0.00     | 0.00       | 0.00      | 0.00          | 0.00  |
| NH3             | 0.00            | 0.00           | 0.00     | 0.00       | 0.00      | 0.00          | 0.00  |
| O2              | 0.00            | 0.00           | 0.70     | 0.00       | 0.35      | 0.00          | 0.00  |

378



**Table S10.** Syngas chemical composition of all feedstocks used (continued).

|                 | <b>Barley<br/>Straw</b> | <b>Corn<br/>Stover</b> | <b>Hardwood</b> | <b>Miscanthus</b>  | <b>Mixedwood</b>   | <b>Oats<br/>Straw</b> | <b>Pine</b> |
|-----------------|-------------------------|------------------------|-----------------|--------------------|--------------------|-----------------------|-------------|
| N2              | 58.00                   | 58.00                  | 57.30           | 58.00              | 58.00              | 58.00                 | 58.00       |
| summation       | 99.92                   | 100.00                 | 100.00          | 100.00             | 100.35             | 100.00                | 100.00      |
|                 | <b>Poplar</b>           | <b>Softwood</b>        | <b>Sorghum</b>  | <b>Switchgrass</b> | <b>Wheat Straw</b> | <b>Willow</b>         |             |
| 1-C4H8          | 0.00                    | 0.00                   | 0.00            | 0.00               | 0.03               | 0.00                  |             |
| 2-cis-C4H8      | 0.00                    | 0.00                   | 0.00            | 0.00               | 0.00               | 0.00                  |             |
| 2-trans-C4H8    | 0.00                    | 0.00                   | 0.00            | 0.00               | 0.00               | 0.00                  |             |
| C2H2            | 0.00                    | 0.00                   | 0.00            | 0.00               | 0.13               | 0.00                  |             |
| C2H4            | 0.80                    | 0.97                   | 0.00            | 0.00               | 1.81               | 0.06                  |             |
| C2H6            | 0.04                    | 0.00                   | 0.42            | 0.00               | 0.00               | 0.07                  |             |
| C3H6            | 0.00                    | 0.00                   | 0.00            | 0.00               | 0.04               | 0.00                  |             |
| C3H8            | 0.00                    | 0.00                   | 0.00            | 0.00               | 0.34               | 0.03                  |             |
| CH4             | 3.61                    | 5.88                   | 4.11            | 3.90               | 6.85               | 1.51                  |             |
| CO              | 9.74                    | 3.61                   | 17.56           | 10.77              | 12.19              | 27.51                 |             |
| CO <sub>2</sub> | 8.74                    | 2.35                   | 14.06           | 9.84               | 9.24               | 3.79                  |             |
| COS             | 0.00                    | 0.00                   | 0.00            | 0.00               | 0.00               | 0.00                  |             |
| H2              | 19.07                   | 29.19                  | 5.24            | 17.50              | 10.67              | 8.30                  |             |
| H2O             | 0.00                    | 0.00                   | 0.00            | 0.00               | 0.00               | 0.00                  |             |
| H2S             | 0.00                    | 0.00                   | 0.00            | 0.00               | 0.03               | 0.00                  |             |
| HCL             | 0.00                    | 0.00                   | 0.00            | 0.00               | 0.00               | 0.00                  |             |
| He              | 0.00                    | 0.00                   | 0.00            | 0.00               | 0.67               | 0.00                  |             |
| LHV             | 0.00                    | 0.00                   | 0.00            | 0.00               | 0.00               | 0.00                  |             |
| NH3             | 0.00                    | 0.00                   | 0.00            | 0.00               | 0.00               | 0.00                  |             |
| O2              | 0.00                    | 0.00                   | 0.00            | 0.00               | 0.00               | 2.70                  |             |
| N2              | 58.00                   | 58.00                  | 58.61           | 58.00              | 58.00              | 56.00                 |             |
| Summation       | 100.00                  | 100.00                 | 100.00          | 100.00             | 100.00             | 99.97                 |             |

380

381

**Table S11.** Chemical composition of non-pelletized feedstock.

| <b>Componenet</b> | <b>Moisture<br/>content</b> | <b>Ash<br/>content</b> | <b>C%</b> | <b>H%</b> | <b>N%</b> | <b>S%</b> | <b>O%</b> | <b>Cl ppm</b> | <b>LHV<br/>(MJ/kg)</b> | <b>HHV<br/>MJ/kg)</b> |
|-------------------|-----------------------------|------------------------|-----------|-----------|-----------|-----------|-----------|---------------|------------------------|-----------------------|
| Barley Straw      | 10.00                       | 4.50                   | 41.85     | 5.03      | 0.47      | 0.11      | 37.51     | 5225.43       | 15.30                  | 16.65                 |
| Corn stover       | 20.00                       | 4.80                   | 36.52     | 4.56      | 0.49      | 0.06      | 33.16     | 0.23          | 13.11                  | 14.42                 |
| Hardwood          | 50.00                       | 1.08                   | 26.18     | 3.10      | 0.08      | 0.01      | 19.87     | 25.00         | 8.95                   | 10.82                 |
| MixedWood         | 50.00                       | 1.40                   | 26.19     | 3.03      | 0.20      | 0.05      | 19.31     | 25.00         | 8.79                   | 10.66                 |
| Oats Straw        | 10.00                       | 6.18                   | 42.27     | 4.82      | 0.54      | 0.09      | 36.97     | 7155.00       | 15.37                  | 16.67                 |
| Pine              | 40.00                       | 2.38                   | 31.19     | 3.40      | 0.22      | 0.02      | 22.80     | 0.01          | 10.67                  | 12.27                 |
| Poplar            | 40.00                       | 1.06                   | 29.28     | 3.58      | 0.17      | 0.03      | 25.86     | 0.02          | 10.04                  | 11.54                 |
| Softwood          | 50.00                       | 1.71                   | 26.20     | 2.95      | 0.32      | 0.09      | 18.74     | 0.00          | 8.63                   | 10.50                 |
| Sorghum           | 20.00                       | 5.62                   | 36.73     | 3.97      | 0.64      | 0.04      | 32.76     | 2293.33       | 13.10                  | 14.47                 |
| Switchgrass       | 15.00                       | 6.14                   | 40.19     | 4.91      | 0.58      | 0.10      | 32.93     | 0.15          | 14.16                  | 16.28                 |
| Miscanthus        | 15.00                       | 6.14                   | 40.19     | 4.91      | 0.58      | 0.10      | 32.93     | 0.15          | 14.16                  | 16.28                 |
| Wheat Straw       | 10.00                       | 4.99                   | 41.36     | 5.05      | 1.00      | 0.10      | 36.83     | 3045.33       | 15.87                  | 17.29                 |
| Willow            | 50.00                       | 0.77                   | 24.76     | 3.07      | 0.26      | 0.04      | 21.11     | 7.79          | 9.68                   | 9.95                  |

382

383

384 **Table S12.** Chemical composition of pelletized feedstock.

| <b>Component</b> | <b>Moisture<br/>(%)</b> | <b>Ash content<br/>(%)</b> | <b>C<br/>(%)</b> | <b>H<br/>(%)</b> | <b>N<br/>(%)</b> | <b>S<br/>(%)</b> | <b>O<br/>(%)</b> | <b>Cl<br/>(%)</b> | <b>LHV<br/>(MJ/kg)</b> | <b>HHV<br/>(kJ/kg)</b> |
|------------------|-------------------------|----------------------------|------------------|------------------|------------------|------------------|------------------|-------------------|------------------------|------------------------|
| Barley Straw     | 10.00                   | 4.50                       | 41.85            | 5.03             | 0.47             | 0.11             | 37.51            | 0.01              | 15.30                  | 16830                  |
| Corn Stover      | 10                      | 5.40                       | 41.09            | 5.13             | 0.55             | 0.07             | 37.30            | 0.26              | 15.06                  | 16566                  |
| Hardwood         | 10.00                   | 1.35                       | 47.13            | 5.58             | 0.15             | 0.01             | 35.77            | 0.00              | 18.06                  | 19866                  |
| Miscanthus       | 9.00                    | 6.57                       | 43.03            | 5.25             | 0.63             | 0.10             | 35.25            | 0.00              | 15.33                  | 16863                  |
| Mixedwood        | 10.00                   | 2.22                       | 47.14            | 5.45             | 0.36             | 0.09             | 34.75            | 0.05              | 17.78                  | 19554.33               |
| Oats Straw       | 10.00                   | 6.18                       | 42.27            | 4.82             | 0.54             | 0.09             | 36.97            | 0.01              | 15.37                  | 16901.5                |
| Pine             | 10.00                   | 3.57                       | 46.78            | 5.10             | 0.33             | 0.03             | 34.20            | 0.00              | 17.10                  | 18810                  |
| Poplar           | 10.00                   | 1.58                       | 43.93            | 5.37             | 0.23             | 0.04             | 38.79            | 0.00              | 16.27                  | 17901.4                |
| Softwood         | 10.00                   | 3.08                       | 47.15            | 5.31             | 0.57             | 0.16             | 33.73            | 0.10              | 17.49                  | 19242.67               |
| Sorghum          | 10.00                   | 6.33                       | 41.32            | 4.47             | 0.73             | 0.04             | 36.86            | 0.00              | 15.04                  | 16547.67               |
| Switchgrass      | 9.00                    | 6.57                       | 43.03            | 5.25             | 0.63             | 0.10             | 35.25            | 0.00              | 15.33                  | 16863                  |
| Wheat Straw      | 10.00                   | 4.99                       | 41.36            | 5.05             | 1.00             | 0.10             | 36.83            | 0.00              | 15.87                  | 17453.33               |
| Willow           | 10.00                   | 1.39                       | 44.57            | 5.52             | 0.47             | 0.04             | 38.00            | 0.00              | 15.97                  | 17570.67               |

385

### 386 5.3 Sensitivity analyses

387 Sensitivity analyses were performed to identify parameters that the revenue required to  
 388 breakeven was most sensitive to. The most sensitive parameters for both PC and IGCC are presented  
 389 in Table S8 below and a complete list of parameters is shown in

Table S14. Sensitivity analyses were conducted by changing one input parameter by  $\pm 10\%$  and measuring the change in an output variable, the revenue required to breakeven. Revenue required to breakeven was chosen as an apt output parameter since it provides a means of representing the total cost required to run a powerplant and the total power output. In future works, a multi-component sensitivity analysis will be performed by varying multiple parameters at once.

Sensitivity Analyses were evaluated using the following equation:

$$\text{Sensitivity} = \frac{\text{Revenue}_{\text{Base}} - \text{Revenue}_{\text{Sensitivity}}}{\text{Revenue}_{\text{Base}}} * 100 \quad (1)$$

**Table S13.** Most significant parameters determined from sensitivity analyses of pelletized pine. Parameters relevant to the CCS unit of the powerplant shown in bold.

| PC                                            | IGCC                       |
|-----------------------------------------------|----------------------------|
| Boiler Efficiency                             | Capacity Factor            |
| Capacity Factor                               | Turbine Inlet Temperature  |
| <b>CO<sub>2</sub> Unit compression Energy</b> | Feedstock Cost             |
| Discount Rate                                 | Plant or Project Book Life |
| Feedstock Cost                                | Total Carbon in Slag       |
| Gas Phase Pressure Drop                       |                            |
| MEA Cost                                      |                            |
| Plant or Project Book Life                    |                            |
| <b>Regenerator Heat Requirement</b>           |                            |
| <b>Sorbent Concentration</b>                  |                            |
| <b>Sorbent Losses</b>                         |                            |

**Table S14.** List of PC parameters tested in sensitivity analyses.

|                                                                      |            |
|----------------------------------------------------------------------|------------|
| Fuel Cost                                                            | 60         |
| Capacity factor                                                      | 90.00      |
| Ambient air temperature                                              | 18.89      |
| relative humidity                                                    | 50.00%     |
| discount rate (before taxes)                                         | 0.07       |
| plant or project book life                                           | 30.00      |
| land cost use                                                        | 3000.00    |
| total land requirement                                               | 0.52       |
| construction time                                                    | 3.00       |
| activated carbon                                                     | 2417.00    |
| MEA                                                                  | 2589.00    |
| SCR catalyst                                                         | 6003.00    |
| boiler efficiency                                                    | 90.00      |
| excess air for furnace                                               | 20.00      |
| leakage air at preheater                                             | 10.00      |
| Percent ash entering flue gas stream                                 | 65.00%     |
| Sorbent Concentration (wt %)                                         | 30.00      |
| Lean CO <sub>2</sub> Loading (mol CO <sub>2</sub> /mol sorb)         | 0.20       |
| Sorbent Losses (excluding acid gasses) (kg/tonne CO <sub>2</sub> )   | 2.25       |
| Sorbent Recovered (kg/tonne CO <sub>2</sub> )                        | 0.20       |
| Gas Phase Pressure Drop (MPa)                                        | 0.01       |
| ID Fan Efficiency (%)                                                | 75.00      |
| Activated Carbon Used (kg/tonne CO <sub>2</sub> )                    | 0.08       |
| Regenerator Heat Requirement (kJ/kg CO <sub>2</sub> )                | 4722.00    |
| Regenerator Steam Heat Content (kJ/kg steam)                         | 3194.00    |
| Pump Efficiency (%)                                                  | 75.00      |
| Percent Solids in Reclaimer Waste (%)                                | 40.00      |
| CO <sub>2</sub> Product Pressure (MPa)                               | 13.79      |
| CO <sub>2</sub> Compressor Efficiency (%)                            | 80.00      |
| CO <sub>2</sub> Unit Compression Energy (kWh/tonne CO <sub>2</sub> ) | 117.90     |
| Construction Time (years)                                            | 3.00       |
| Sorbent Cost (\$/tonne)                                              | 2589.00    |
| Inhibitor Cost (% of MEA)                                            | 20.00      |
| Activated Carbon Cost (\$/tonne)                                     | 2417.00    |
| Caustic (NaOH) Cost (\$/tonne)                                       | 499.20     |
| Water Cost (\$/kliter)                                               | 0.30       |
| Number of Operating Jobs (jobs/shift)                                | 2.00       |
| Number of Operating Shifts (shifts/day)                              | 4.75       |
| Total Pipeline Length (km)                                           | 100.00     |
| Booster Pump Efficiency (%)                                          | 75.00      |
| Design Pipeline Flow (tonne/yr)                                      | 5439000.00 |
| Actual Pipeline Flow (tonne/yr)                                      | 4896000.00 |
| Inlet Pressure (@ power plant) (MPa)                                 | 13.79      |
| Min Outlet Pressure (@ storage site) (MPa)                           | 10.30      |
| Average Ground Temperature (deg. C)                                  | 5.60       |
| Pipe Material Roughness (centimeters)                                | 0.00       |
| Construction Time (years)                                            | 3.00       |
| Booster Pump Operating Cost (%PFC)                                   | 1.50       |
| Fixed O&M Cost (\$/km-yr)                                            | 3100.00    |
| Reservoir Depth (meters)                                             | 1219.00    |
| Reservoir Thickness (meters)                                         | 304.80     |

401

**Table S14.** List of PC parameters tested in sensitivity analyses (continued).

|                                                                 |           |
|-----------------------------------------------------------------|-----------|
| Reservoir Horizontal Permeability (mD)                          | 100.00    |
| Reservoir Porosity (%)                                          | 12.00     |
| Storage Coefficient (%)                                         | 5.80      |
| Reservoir Surface Temperature (deg. C)                          | 45.44     |
| Geographical Area for CO <sub>2</sub> Storage (sq km)           | 70190.00  |
| Project Average Injection Rate (Mt CO <sub>2</sub> /yr)         | 4.90      |
| Design Maximum Injection Rate per Well (Mt CO <sub>2</sub> /yr) | 6.12      |
| Operation Duration (years)                                      | 30.00     |
| Miscellaneous Operations (%)                                    | 1.00      |
| PISC and Site Closure Duration (years)                          | 50.00     |
| Well Seismic: VSP Tool Costs (\$/well)                          | 300000.00 |
| Miscellaneous PISC and Site Closure (%)                         | 0.50      |

402

403

**Table S15.** List of IGCC parameters tested in sensitivity analyses.

| <b>Parameter</b>                                    | <b>Base Case</b> |
|-----------------------------------------------------|------------------|
| Capacity Factor (%)                                 | 90               |
| Ambient Air Temperature (Dry Bulb Average) (deg. C) | 18.89            |
| Ambient Air Pressure (MPa)                          | 0.1014           |
| Relative Humidity (Average) (%)                     | 50               |
| Plant or Project Book Life (years)                  | 30               |
| Total Delivered Cost (as-fired) (\$/tonne)          | 55.39            |
| Oxygen (O <sub>2</sub> ) (vol %)                    | 95               |
| Gasifier Temperature (deg. C)                       | 1343             |
| Gasifier Pressure (MPa)                             | 4.24             |
| Oxygen Input from ASU (mol O <sub>2</sub> /mol C)   | 0.4257           |
| Total Carbon in Slag (%)                            | 3                |
| H <sub>2</sub> S Removal Efficiency (%)             | 98               |
| Max Syngas Capacity per Train (tonne/hr)            | 225.2            |
| Sulfur Recovery Efficiency (%)                      | 95               |
| H <sub>2</sub> S Removal Efficiency (%)             | 94               |
| CO <sub>2</sub> Product Pressure (MPa)              | 13.79            |
| Turbine Inlet Temperature (deg. C)                  | 1371             |
| HRSG Outlet Temperature (deg. C)                    | 121.1            |

404



405 **Table S16.** Modeled LCOE and CO<sub>2</sub> emissions for the BECCs plants used to calculate  
406 CAC.

| Scenario | PC 2040              |                   | IGCC 2020            |                   | IGCC 2040<br>Conventional |                   | IGCC 2040 Pellets    |                   |
|----------|----------------------|-------------------|----------------------|-------------------|---------------------------|-------------------|----------------------|-------------------|
|          | LCOE <sub>ECCS</sub> | E <sub>ECCS</sub> | LCOE <sub>ECCS</sub> | E <sub>ECCS</sub> | LCOE <sub>ECCS</sub>      | E <sub>ECCS</sub> | LCOE <sub>ECCS</sub> | E <sub>ECCS</sub> |
| 1        | 144.49               | 1.37              | 141.12               | -0.46             | 157.57                    | -0.96             | 131.80               | -0.88             |
| 2        | 144.71               | 1.41              | 165.48               | -0.55             | 139.39                    | -0.88             | 148.42               | -0.90             |
| 3        | 145.04               | 1.42              | 151.97               | -0.47             | 139.19                    | -0.86             | 131.26               | -0.82             |
| 4        | 147.24               | -1.43             | 176.16               | -0.55             | 152.78                    | -0.90             | 144.16               | -0.85             |
| 5        | 155.10               | -1.42             | 173.68               | -0.53             | 151.35                    | -0.89             | 147.72               | -0.89             |
| 6        | 165.75               | -1.41             | 176.93               | -0.52             | 166.83                    | -0.93             | 149.73               | -0.86             |
| 7        | 166.89               | -1.42             | 162.65               | -0.51             | 168.10                    | -0.91             | 161.96               | -0.89             |
| 8        | 167.50               | -1.40             | 165.33               | -0.46             | 168.60                    | -0.88             | 168.54               | -0.89             |
| 9        | 177.30               | -1.40             | 184.19               | -0.49             | 177.73                    | -0.86             | 180.00               | -0.88             |
| 10       | 194.56               | -1.35             | 216.67               | -0.49             | 198.20                    | -0.84             | 195.35               | -0.84             |
| 11       | 195.29               | -1.34             | 219.09               | -0.73             | 194.00                    | -0.85             | 195.97               | -0.87             |

407

408 **Table S17.** Modeled LCOE and CO<sub>2</sub> emissions for the coal [35] and IGCC [36] reference  
409 plants used to calculate CAC.

|                        | PC Coal Reference Case |                       |                           |                   | NGCC Reference Case   |                           |                   |
|------------------------|------------------------|-----------------------|---------------------------|-------------------|-----------------------|---------------------------|-------------------|
|                        | Scenario               | LCOE <sub>EBase</sub> | E <sub>Supply Chain</sub> | E <sub>Base</sub> | LCOE <sub>EBase</sub> | E <sub>Supply Chain</sub> | E <sub>Base</sub> |
| PC 2040 Pellets        | 1                      | 43.00                 | 0.061                     | 0.82              | 61.96                 | 0.025                     | 0.36              |
|                        | 2                      | 43.23                 | 0.061                     | 0.82              | 61.96                 | 0.025                     | 0.36              |
|                        | 3                      | 43.12                 | 0.061                     | 0.82              | 61.96                 | 0.025                     | 0.36              |
|                        | 4                      | 43.05                 | 0.061                     | 0.82              | 61.96                 | 0.025                     | 0.36              |
|                        | 5                      | 43.00                 | 0.061                     | 0.82              | 61.96                 | 0.025                     | 0.36              |
|                        | 6                      | 43.18                 | 0.061                     | 0.82              | 61.96                 | 0.025                     | 0.36              |
|                        | 7                      | 43.17                 | 0.061                     | 0.82              | 61.96                 | 0.025                     | 0.36              |
|                        | 8                      | 43.33                 | 0.061                     | 0.82              | 61.96                 | 0.025                     | 0.36              |
|                        | 9                      | 43.64                 | 0.061                     | 0.82              | 61.96                 | 0.025                     | 0.36              |
| IGCC 2020 Conventional | 1                      | 58.40                 | 0.061                     | 0.83              | 63.76                 | 0.025                     | 0.36              |
|                        | 2                      | 58.40                 | 0.061                     | 0.83              | 63.76                 | 0.025                     | 0.36              |
|                        | 3                      | 58.40                 | 0.061                     | 0.83              | 63.76                 | 0.025                     | 0.36              |
|                        | 4                      | 58.40                 | 0.061                     | 0.83              | 63.76                 | 0.025                     | 0.36              |
|                        | 5                      | 57.03                 | 0.061                     | 0.83              | 63.61                 | 0.025                     | 0.36              |
|                        | 6                      | 56.15                 | 0.061                     | 0.83              | 63.52                 | 0.025                     | 0.36              |
|                        | 7                      | 55.09                 | 0.061                     | 0.83              | 63.41                 | 0.025                     | 0.36              |
|                        | 8                      | 55.54                 | 0.061                     | 0.83              | 63.45                 | 0.025                     | 0.36              |
|                        | 9                      | 55.74                 | 0.061                     | 0.83              | 63.47                 | 0.025                     | 0.36              |
| IGCC 2040 Conventional | 1                      | 58.40                 | 0.061                     | 0.83              | 63.76                 | 0.025                     | 0.36              |
|                        | 2                      | 57.95                 | 0.061                     | 0.83              | 63.71                 | 0.025                     | 0.36              |
|                        | 3                      | 56.07                 | 0.061                     | 0.83              | 63.51                 | 0.025                     | 0.36              |
|                        | 4                      | 55.69                 | 0.061                     | 0.83              | 63.47                 | 0.025                     | 0.36              |
|                        | 5                      | 53.32                 | 0.061                     | 0.83              | 63.21                 | 0.025                     | 0.36              |
|                        | 6                      | 53.55                 | 0.061                     | 0.83              | 63.24                 | 0.025                     | 0.36              |
|                        | 7                      | 51.91                 | 0.061                     | 0.82              | 63.05                 | 0.025                     | 0.36              |
|                        | 8                      | 51.16                 | 0.061                     | 0.82              | 62.97                 | 0.025                     | 0.36              |
|                        | 9                      | 50.41                 | 0.061                     | 0.82              | 62.88                 | 0.025                     | 0.36              |
| IGCC 2040 Pellets      | 1                      | 57.53                 | 0.061                     | 0.83              | 63.67                 | 0.025                     | 0.36              |
|                        | 2                      | 56.65                 | 0.061                     | 0.83              | 63.57                 | 0.025                     | 0.36              |
|                        | 3                      | 55.81                 | 0.061                     | 0.83              | 63.48                 | 0.025                     | 0.36              |
|                        | 4                      | 55.17                 | 0.061                     | 0.83              | 63.42                 | 0.025                     | 0.36              |
|                        | 5                      | 53.04                 | 0.061                     | 0.83              | 63.18                 | 0.025                     | 0.36              |
|                        | 6                      | 52.07                 | 0.061                     | 0.82              | 63.07                 | 0.025                     | 0.36              |
|                        | 7                      | 51.45                 | 0.061                     | 0.82              | 63.00                 | 0.025                     | 0.36              |
|                        | 8                      | 50.51                 | 0.061                     | 0.82              | 62.89                 | 0.025                     | 0.36              |
|                        | 9                      | 49.81                 | 0.061                     | 0.82              | 62.82                 | 0.025                     | 0.36              |

410

411

413 **References:**

- 414 1. USDOE. *2016 Billion-Ton Report: Advancing Domestic Resources for a Thriving*  
 415 *Bioeconomy, Volume 1: Economic Availability of Feedstocks*; ORNL/TM-2005/66; Oak  
 416 Ridge National Laboratory: Oak Ridge, TN, 2016; p 448.
- 417 2. USGS. National Assessment of Geologic Carbon Dioxide Storage  
 418 Resources—Data. Available online: <https://pubs.usgs.gov/ds/774/> (accessed on January 2020).
- 419 3. Baik, E.; Sanchez, D.L.; Turner, P.A.; Mach, K.J.; Field, C.B.; Benson, S.M. Geospatial  
 420 analysis of near-term potential for carbon-negative bioenergy in the United States. *Proc*  
 421 *Natl Acad Sci U S A* **2018**, *115*, 3290-3295, doi:10.1073/pnas.1720338115.
- 422 4. IECM. Integrated Environmental Control Model (IECM) Version 11.2 (Carnegie Mellon  
 423 University). Available online: <https://www.cmu.edu/epp/iecm/index.html> (accessed on  
 424 5. Canter, C.; Qin, Z.; Cai, H.; Dunn, J.; Wang, M.; Scott, D.A. Chapter 4: Fossile Energy  
 425 Consumption and Greenhouse Gas Emissions, Including Soil Carbon Effects, of Producing  
 426 Agriculture and Forestry Feedstocks. In *2016 Billion-Ton Report: Advancing Domestic*  
 427 *Resources for a Thriving Bioeconomy, Volume 2: Environmental Sustainability Effects of*  
 428 *Select Scenarios from Volume 1.*, Efroymsen, R., Langholtz, M., Johnson, K., Stokes, B.,  
 429 Eds. Oak Ridge National Laboratory: Oak Ridge, TN, 2017; 10.2172/1338837p. 624.
- 430 6. Roni, M.; Thompson, D.; Hartley, D.; Griffel, M.; Hu, H.; Nguyen, Q.; Cai, H. *Herbaceous*  
 431 *Feedstock 2018 State of Technology Report*; Idaho National Laboratory: 2018; p 298.
- 432 7. Hartley, D.; Thompson, D.; Hu, H.; Cai, H. *Woody Feedstock 2017 State of Technology*  
 433 *Report*; Idaho National Laboratory: 2017; p 85.
- 434 8. NOGA. USGS National Assessment of Oil and Gas Online. 2003.  
 435 <http://energy.cr.usgs/oilgas/noga>
- 436 9. Environmental Protection Agency. 40 CFR Parts 124, 144, 145 et al. Federal Requirements  
 437 Under the Underground Injection Control (UIC) Program for Carbon Dioxide (CO<sub>2</sub>)  
 438 Geologic Sequestration (GC) Well; Final Rule, December 10, 2010. 2010.  
 439 <https://www.epa.gov/uic/class-vi-wells-used-geologic-sequestration-co2>
- 440 10. Agency, E.P. North Dakota Underground Injection Control Program Revision Application  
 441 to add Class VI wells to its 1422 program. **2018**.
- 442 11. PCO<sub>2</sub>R Partnership. Plains CO<sub>2</sub> Reduction Partnership. Available online:  
 443 <http://www.undeerc.org/pcor/> (accessed on  
 444 12. Benson, S.M.; Cole, D.R. CO<sub>2</sub> sequestration in deep sedimentary formations. *Elements*  
 445 **2008**, *4*, 325-331.
- 446 13. US DOE Office of Fossil Energy. 16,067,208 Metric Tons of CO<sub>2</sub> Injected as of January 3,  
 447 2018. Available online: [https://www.energy.gov/fe/16067208-metric-tons-co2-injected-](https://www.energy.gov/fe/16067208-metric-tons-co2-injected-january-3-2018)  
 448 [january-3-2018](https://www.energy.gov/fe/16067208-metric-tons-co2-injected-january-3-2018) (accessed on  
 449 14. GCCSI. The global status of CCS: 2017. 2017. [https://www.globalccsinstitute.com/wp-](https://www.globalccsinstitute.com/wp-content/uploads/2018/12/2017-Global-Status-Report.pdf)  
 450 [content/uploads/2018/12/2017-Global-Status-Report.pdf](https://www.globalccsinstitute.com/wp-content/uploads/2018/12/2017-Global-Status-Report.pdf)
- 451 15. Burnside, N.M.; Naylor, M. Review and implications of relative permeability of CO<sub>2</sub>/brine  
 452 systems and residual trapping of CO<sub>2</sub>. *International Journal of Greenhouse Gas Control*  
 453 **2014**, *23*, 1-11, doi:<https://doi.org/10.1016/j.ijggc.2014.01.013>.
- 454 16. Dooley, J.J.; Davison, C.L.; Dahowski, R.T. *An assessment of the commercial availability*  
 455 *of carbon dioxide capture and storage technologies as of June 2009*; PNNL-1852; Pacific  
 456 Northwest Laboratory: 2009.
- 457 17. National Academies of Sciences, E.; Medicine; Division on, E.; Life, S.; Ocean Studies, B.;  
 458 Board on Chemical, S.; Technology; Board on Earth, S.; Resources; Board on, A., et al. In  
 459 *Negative Emissions Technologies and Reliable Sequestration: A Research Agenda*, National  
 460 Academies Press (US)
- 461 Copyright 2019 by the National Academy of Sciences. All rights reserved.: Washington (DC),  
 462 2018; 10.17226/25259.
- 463 18. USGS. *Geologic framework for the national assessment of carbon dioxide storage*  
 464 *resources*; 2012-1024; Reston, VA, 2012.
- 465 19. USGS. National assessment of geologic carbon dioxide storage resources – Data, DS 774.  
 466 2013.

20. ZEP. European Technology Platform for Zero Emission Fossil Fuel Power Plants. Available online: [www.zeroemissionsplatform.eu/ccs-technology/storage](http://www.zeroemissionsplatform.eu/ccs-technology/storage) (accessed on 2020).
21. Bachu, S. Review of CO<sub>2</sub> storage efficiency in deep saline aquifers. *International Journal of Greenhouse Gas Control* **2015**, *40*, 188-202, doi:<https://doi.org/10.1016/j.ijggc.2015.01.007>.
22. Lukawski, M.Z.; Anderson, B.J.; Augustine, C.; Capuano, L.E.; Beckers, K.F.; Livesay, B.; Tester, J.W. Cost analysis of oil, gas, and geothermal well drilling. *Journal of Petroleum Science and Engineering* **2014**, *118*, 1-14, doi:<https://doi.org/10.1016/j.petrol.2014.03.012>.
23. TNO. Phyllis2: Database for the physico-chemical composition of (treated) lignocellulosic biomass, micro- and macroalgae, various feedstocks for biogas production and biochar. 2020. <https://phyllis.nl/>
24. Strauss, W. A strategy for converting coal fueled power plants to biomass that does not raise the cost of electricity and creates jobs. FutureMetrics LLC: 2014. [http://www.futuremetrics.info/wp-content/uploads/2014/09/Pulverized Coal to Pulverized Wood Pellets.pdf](http://www.futuremetrics.info/wp-content/uploads/2014/09/Pulverized_Coal_to_Pulverized_Wood_Pellets.pdf)
25. Fantozzi, F.; Bartocci, P. 4 - Biomass feedstock for IGCC systems. In *Integrated Gasification Combined Cycle (IGCC) Technologies*, Wang, T., Stiegel, G., Eds. Woodhead Publishing: 2017; doi:<https://doi.org/10.1016/B978-0-08-100167-7.00004-4>pp. 145-180.
26. Zhang, Y.; Ahn, H. The implications of choice between sour and sweet shift on process design and operation of an IGCC power plant integrated with a dual-stage selexol unit. *Energy* **2019**, *173*, 1273-1284, doi:<https://doi.org/10.1016/j.energy.2019.02.085>.
27. Carpenter, D.L.; Bain, R.L.; Davis, R.E.; Dutta, A.; Feik, C.J.; Gaston, K.R.; Jablonski, W.; Phillips, S.D.; Nimlos, M.R. Pilot-Scale Gasification of Corn Stover, Switchgrass, Wheat Straw, and Wood: 1. Parametric Study and Comparison with Literature. *Industrial & Engineering Chemistry Research* **2010**, *49*, 1859-1871, doi:10.1021/ie900595m.
28. Maglinao, A.L.; Capareda, S.C.; Nam, H. Fluidized bed gasification of high tonnage sorghum, cotton gin trash and beef cattle manure: Evaluation of synthesis gas production. *Energy Conversion and Management* **2015**, *105*, 578-587, doi:<https://doi.org/10.1016/j.enconman.2015.08.005>.
29. Abdoulmoumine, N.; Kulkarni, A.; Adhikari, S. Effects of Temperature and Equivalence Ratio on Pine Syngas Primary Gases and Contaminants in a Bench-Scale Fluidized Bed Gasifier. *Industrial & Engineering Chemistry Research* **2014**, *53*, 5767-5777, doi:10.1021/ie404401n.
30. Couhert, C.; Salvador, S.; Commandré, J.M. Impact of torrefaction on syngas production from wood. *Fuel* **2009**, *88*, 2286-2290, doi:<https://doi.org/10.1016/j.fuel.2009.05.003>.
31. Gądek, W.; Mlonka-Mędrała, M.; Prestipino, M.; Evangelopoulos, P.; Kalisz, S.; Yang, W. Gasification and pyrolysis of different biomasses in lab scale system: A comparative study. *E3S Web Conf.* **2016**, *10*, 00024.
32. Galvagno, S.; Casciaro, G.; Casu, S.; Martino, M.; Mingazzini, C.; Russo, A.; Portofino, S. Steam gasification of tyre waste, poplar, and refuse-derived fuel: A comparative analysis. *Waste Manage.* **2009**, *29*, 678-689, doi:<https://doi.org/10.1016/j.wasman.2008.06.003>.
33. Kumar, A.; Jones, D.; Hanna, M. Thermochemical Biomass Gasification: A Review of the Current Status of the Technology. *Energies* **2009**, *2*, 556-581.
34. Woytiuk, K.R. Production of Syngas from Torrefied Short-Rotation Coppice Willow. University of Saskatchewan, 2017.
35. Wang, C.; Mu, D. An LCA study of an electricity coal supply chain. *2014* **2014**, 10.3926/jiem.1053, 25, doi:10.3926/jiem.1053.
36. Mac Kinnon, M.A.; Brouwer, J.; Samuelsen, S. The role of natural gas and its infrastructure in mitigating greenhouse gas emissions, improving regional air quality, and renewable resource integration. *Progress in Energy and Combustion Science* **2018**, *64*, 62-92, doi:<https://doi.org/10.1016/j.pecs.2017.10.002>.
